**Title:** Resistance, resilience, and functional redundancy of freshwater bacterioplankton communities facing a gradient of agricultural stressors in a mesocosm experiment

**Running title:** Bacterioplankton responses to pesticides

**Authors:** Naíla Barbosa da Costa<sup>1,2</sup>, Vincent Fugère<sup>2,3,4,5</sup>, Marie-Pier Hébert<sup>2,6</sup>, Charles C.Y. Xu<sup>3,6,7</sup>, Rowan D.H. Barrett<sup>3,6,7</sup>, Beatrix E. Beisner<sup>2,4</sup>, Graham Bell<sup>3,6</sup>, Viviane Yargeau<sup>8</sup>, Gregor F. Fussmann<sup>2,3,6</sup>, Andrew Gonzalez<sup>3,6</sup>, B. Jesse Shapiro<sup>1,2,3,9,10†</sup>

<sup>1</sup> Département des sciences biologiques, Université de Montréal, Montreal, Canada

<sup>2</sup> Groupe de Recherche Interuniversitaire en Limnologie et environnement aquatique (GRIL)

<sup>3</sup> Québec Centre for Biodiversity Science (QCBS)

<sup>4</sup> Département des sciences biologiques, Université du Québec à Montréal, Montreal, Canada

<sup>5</sup> Département des sciences de l'environnement, Université du Québec à Trois-Rivières, Trois-Rivières, Canada

<sup>6</sup> Department of Biology, McGill University, Montreal, Canada

<sup>7</sup> Redpath Museum, McGill University, Montreal, Canada

<sup>8</sup> Department of Chemical Engineering, McGill University, Montreal, Canada

<sup>9</sup> Department of Microbiology and Immunology, McGill University, Montreal, Canada

<sup>10</sup> McGill Genome Centre, McGill University, Montreal, Canada

† Corresponding author: [jesse.shapiro@mcgill.ca](mailto:jesse.shapiro@mcgill.ca)

1 **Abstract**

2 Agricultural pollution with fertilizers and pesticides is a common disturbance to  
3 freshwater biodiversity. Bacterioplankton communities are at the base of aquatic food  
4 webs, but their responses to these potentially interacting stressors are rarely explored.  
5 To test the extent of resistance and resilience in bacterioplankton communities faced  
6 with agricultural stressors, we exposed freshwater mesocosms to single and combined  
7 gradients of two commonly used pesticides: the herbicide glyphosate (0-15 mg/L) and  
8 the neonicotinoid insecticide imidacloprid (0-60 µg/L), in high or low nutrient  
9 backgrounds. Over the 43-day experiment, we tracked variation in bacterial density with  
10 flow cytometry, carbon substrate use with Biolog EcoPlates, and taxonomic diversity and  
11 composition with environmental 16S rRNA gene amplicon sequencing. We show that  
12 only glyphosate (at the highest dose, 15 mg/L), but not imidacloprid, nutrients, or their  
13 interactions measurably changed community structure, favoring members of the  
14 Proteobacteria including the genus *Agrobacterium*. However, no change in carbon  
15 substrate use was detected throughout, suggesting functional redundancy despite  
16 taxonomic changes. We further show that communities are resilient at broad, but not  
17 fine taxonomic levels: 24 days after glyphosate application the precise amplicon  
18 sequence variants do not return, and tend to be replaced by phylogenetically close taxa.  
19 We conclude that high doses of glyphosate – but still within commonly acceptable  
20 regulatory guidelines – alter freshwater bacterioplankton by favoring a subset of higher  
21 taxonomic units (i.e. genus to phylum) that transiently thrive in the presence of

22 glyphosate. Longer-term impacts of glyphosate at finer taxonomic resolution merit  
23 further investigation.

24

## 25 **Introduction**

26 Agricultural expansion and intensification are major drivers of global environmental  
27 change in both terrestrial and aquatic ecosystems (Song et al., 2018; Springmann et al.,  
28 2018; Tilman et al., 2001). Chemicals derived from agricultural landscapes, such as  
29 fertilizers and pesticides, are among the main sources of freshwater pollution  
30 (Vörösmarty et al., 2010), leading to eutrophication (Carpenter et al., 1998; Keatley,  
31 Bennett, Macdonald, Taranu, & Gregory-Eaves, 2011) and biodiversity loss (DeLorenzo,  
32 Scott, & Ross, 2001; Relyea, 2009; Stehle & Schulz, 2015). Anthropogenic climate  
33 change may intensify these effects as variation in precipitation patterns and increased  
34 temperatures affect agrochemicals fate, transport, and behavior in surface and  
35 groundwater (Bloomfield, Williams, Goody, Cape, & Guha, 2006; Jeppesen et al.,  
36 2009). Agricultural runoff to waterbodies particularly increases after storms, acting as a  
37 pulse perturbation (Cedergreen & Rasmussen, 2017) while bringing a mixture of  
38 nutrients, herbicides and insecticides that may interact to affect aquatic microbial taxa  
39 (Flood & Burkholder, 2018) and communities (Lozano & Pratt, 1994; Starr, Bargu, Maiti,  
40 & DeLaune, 2017). The impact of agricultural contaminants may depend on whether  
41 they are applied alone or in combination (Altenburger, Backhaus, Boedeker, Faust, &  
42 Scholze, 2013), and the effects of combinations may be difficult to predict based upon  
43 data from single contaminants, possibly due to complex interactions within diverse  
44 bacterial communities (Romero, Acuña, & Sabater, 2020).

45

46 Agricultural activity has a major impact on bacterioplankton (Kraemer et al., 2020) and,  
47 as a consequence, on the ecosystem processes they provide; e.g. decomposition of  
48 organic matter (Piggott, Niyogi, Townsend, & Matthaei, 2015) and nutrient cycling  
49 (Romero et al., 2020). Altering these processes may have broad consequences for  
50 aquatic ecosystem productivity, food webs, and the human activities that depend upon  
51 them (Carpenter, Stanley, & Vander Zanden, 2011).

52

53 Nutrient pollution is among the most important stressors affecting biodiversity in lakes  
54 (Birk et al., 2020). It promotes eutrophication (Smith, Joye, & Howarth, 2006), which can  
55 increase bacterial biomass, reduce phytoplankton diversity, and trigger harmful algal  
56 blooms (Paerl, Otten, & Kudela, 2018; Smith & Schindler, 2009). While few studies have  
57 addressed individual and combined effects of fertilizers with herbicides or insecticides  
58 on phytoplankton and zooplankton communities (Baker, Mudge, Thompson, Houlihan,  
59 & Kidd, 2016; Chará-Serna, Epele, Morrissey, & Richardson, 2019; Geyer, Smith, &  
60 Rettig, 2016), analogous assessments of bacterioplankton are more scarce. Yet, similar  
61 to other planktonic communities, bacteria may also be directly or indirectly (e.g. through  
62 trophic effects) affected by the individual or combined effects of these stressors, despite  
63 not being their intended targets (Muturi, Donthu, Fields, Moise, & Kim, 2017).

64

65 The herbicide glyphosate, mainly formulated commercially as Roundup, and the  
66 neonicotinoid insecticide imidacloprid (available in different commercial formulations) are  
67 among the most commonly used pesticides worldwide (Benbrook, 2016; Simon-Delso et

68 al., 2015), despite restrictions on their use in different jurisdictions. In North America and  
69 the European Union, common benchmarks to protect aquatic life range from 800 to  
70 26,600  $\mu\text{g/L}$  of glyphosate for long-term (chronic) exposure, and between 27,000 to  
71 49,000  $\mu\text{g/L}$  for short-term (acute) exposure (CCME, 2012; EFSA, 2016; EPA, 2019). In  
72 contrast, lower concentrations of imidacloprid are considered safe for aquatic  
73 invertebrates, ranging from 0.009-0.385  $\mu\text{g/L}$  (CCME, 2007; EFSA, 2014; EPA, 2019)  
74 (Table S1). Most of these criteria were developed based on toxicity tests on individual  
75 eukaryotic organisms, and it remains unclear how bacterial communities respond to  
76 these concentrations considered “safe for aquatic life” and what consequences their  
77 responses might have on the ecosystem functions they provide.

78  
79 Glyphosate is a broad-spectrum synthetic phosphonate herbicide used for weed control.  
80 It acts by inhibiting the enzyme enolpyruvylshikimate-3-phosphate synthase (EPSPS)  
81 involved in the biosynthesis of aromatic amino acids essential to plants, its target group,  
82 but also to many fungi and bacteria (Pollegioni, Schonbrunn, & Siehl, 2011). However,  
83 some microorganisms are resistant to glyphosate either by expressing an insensitive  
84 form of the target enzyme (Funke, Han, Healy-Fried, Fischer, & Schönbrunn, 2006;  
85 Healy-Fried, Funke, Priestman, Han, & Scho, 2007) or by metabolizing the molecule and  
86 using it as a phosphorus source (Hove-Jensen, Zechel, & Jochimsen, 2014).  
87 Glyphosate could therefore select for resistant species within bacterial communities  
88 (Muturi et al., 2017). Moreover, as it may prevent the growth of some phytoplankton

89 species (Smedbol, Lucotte, Labrecque, Lepage, & Juneau, 2017), bacterioplankton  
90 could be affected indirectly, for example by reduced competition with phytoplankton.

91  
92 Unlike glyphosate, imidacloprid is an insecticide commonly used as a seed-coating  
93 agent intended to control sapling damage from piercing-sucking insects (CCME, 2007;  
94 Jeschke & Nauen, 2008). It acts on insect nervous systems (Roberts & Hutson, 1999)  
95 and can be toxic to many aquatic invertebrates, especially insects and crustaceans  
96 (Morrissey et al., 2015). Although it is not known to inhibit bacteria directly, it could affect  
97 them indirectly via trophic effects on their predators or grazers. If imidacloprid reduces  
98 total zooplankton biomass, for example, a reduction in predation pressure could promote  
99 an increase in bacterioplankton biomass. Ecosystem functions provided by  
100 bacterioplankton, such as carbon use, could subsequently be affected, as has been  
101 observed in experiments with other insecticides (Thompson et al., 2016).

102  
103 Bacterioplankton are important drivers of energy and nutrient cycling in freshwater  
104 ecosystems (Falkowski, Fenchel, & Delong, 2008; Konopka, 2009), and more  
105 observations are needed to understand how they respond to anthropogenic  
106 disturbances (Allison & Martiny, 2008). They may respond with detectable changes in  
107 species composition (Allison & Martiny, 2008) that could be permanent, thereby  
108 providing a measure of the historical impact of anthropogenic activities on ecosystem  
109 health (Kraemer et al., 2020). Alternatively, community composition could be resistant or  
110 resilient to changes (Shade et al., 2012). Even if disturbances alter community

111 composition, ecosystem processes may remain stable if pre- and post-disturbance  
112 communities are functionally redundant (Allison & Martiny, 2008).

113  
114 Functional redundancy is thought to be common in microbial communities, as most  
115 metabolic pathways controlling biogeochemical cycles are encoded by several different  
116 phylogenetic groups. Certain functions, such as photosynthesis and methanogenesis,  
117 are however phylogenetically restricted (Falkowski et al., 2008). It is likely that  
118 communities are partially redundant for general functions like respiration or biomass  
119 production, but non-redundant for more specific functions encoded by unique taxa  
120 (Louca et al., 2018). The prevalence of, and reasons for microbial community  
121 resistance, resilience, and functional redundancy are still debated (Allison & Martiny,  
122 2008; Shade et al., 2012), particularly in response to novel anthropogenic disturbances  
123 which increasingly involve combinations of stressors.

124  
125 In this study, we experimentally tested the effects of pulse applications of glyphosate  
126 and imidacloprid, under low (mesotrophic) or high (eutrophic) nutrient conditions, on  
127 bacterioplankton community density, taxonomic composition and richness, and functions  
128 related to carbon substrate use. To do so, we filled 1,000 L mesocosms with water and  
129 planktonic organisms from a pristine lake located on a mountaintop of a protected area  
130 with no history of agricultural activity. Using a regression design, we applied gradients of  
131 pesticide concentrations (Fig. 1), spanning ranges observed in surface runoff and  
132 freshwater systems (Hénault-Ethier et al., 2017; Morrissey et al., 2015; van Bruggen et  
133 al., 2018). Highest doses applied are considered harmful to eukaryotic organisms upon

134 which nationwide water quality guidelines are based (Table S1). To quantify individual  
135 and interactive effects of agricultural stressors, we applied these pesticides alone and in  
136 combination, and in the presence or absence of nutrient enrichment simulating fertilizer  
137 pollution. Pesticides were applied as pulse perturbations to mimic how these  
138 contaminants reach natural freshwater ecosystems from agricultural fields, while nutrient  
139 enrichments were applied as press treatments to mimic mesotrophic and eutrophic  
140 conditions.

141  
142 We hypothesize that glyphosate will change bacterial community composition and  
143 reduce richness, as many taxa depend on the target enzyme (EPSPS) to synthesize  
144 aromatic amino acids, while other species encode a resistant allele of EPSPS (Funke et  
145 al., 2006; Healy-Fried et al., 2007; Rainio et al., 2021) or are able to metabolize  
146 glyphosate (Hove-Jensen et al., 2014). While imidacloprid is less likely to directly impact  
147 bacteria, we hypothesize that it can exert indirect effects due to its potential toxicity to  
148 aquatic invertebrates (Chará-Serna et al., 2019), releasing grazing pressure on bacterial  
149 communities and increasing their density. When applied in combination with glyphosate,  
150 imidacloprid may therefore delay or mask the effects of glyphosate on bacterioplankton  
151 community structure. Similarly, fertilizers might also increase microbial productivity and  
152 mask negative effects of glyphosate, as it does with other contaminants (Alexander,  
153 Luis, Culp, Baird, & Cessna, 2013). We also expect some positive effects of glyphosate  
154 on bacterial density, as it may serve as a source of phosphorus for some species  
155 (Hébert, Fugère, & Gonzalez, 2018; Lu et al., 2020). Finally, we predict that functional  
156 diversity will be less prone to changes than taxonomic composition, as bacterial



157 communities tend to be functionally redundant (Louca et al., 2018). We thus expect to  
158 detect changes in bacterial community composition and species richness at lower  
159 pesticide doses, and changes in functional diversity only at higher doses, or not at all.

160

## 161 **Materials and methods**

### 162 *Experimental design and sampling*

163 We conducted a mesocosm experiment at the Large Experimental Array of Ponds  
164 (LEAP) platform at McGill University's Gault Nature Reserve (45°32'N, 73°08'W), a  
165 protected area with no history of agricultural pollution (Beauséjour, Handa, Lechowicz,  
166 Gilbert, & Vellend, 2015) in Quebec, Canada. The pond mesocosms at LEAP are  
167 connected to a reservoir that receives water from the upstream Lake Hertel through a 1  
168 km pipe by gravity. On May 11<sup>th</sup>, 2016 (99 days prior to the start of the experiment), 100  
169 ponds were simultaneously filled with 1,000 L of lake water, to acclimate communities to  
170 the mesocosm setting. When filling ponds we used a coarse sieve to prevent fish  
171 introduction. To maximize initial homogeneity among communities (before treatments),  
172 and because this study focuses on planktonic microbes, no sediment substrate was  
173 added to the ponds. Tadpoles and large debris such as leaves and pollen were  
174 periodically removed with a net before the experiment commenced. Additional lake  
175 water was added on a biweekly basis (~10% of total volume) between May and August  
176 to ensure a continuous input of lake bacterioplankton, tracking seasonal changes in the  
177 source lake community, and to homogenize communities across ponds. The experiment  
178 reported here used 48 of these pond mesocosms from August 17<sup>th</sup> (day 1) to September

179 28<sup>th</sup> (day 43), and it is part of a collaborative experiment that also assessed responses  
180 of zooplankton in the same set of ponds (Hébert et al., 2021) and phytoplankton  
181 responses in a subset of these ponds for a longer period of time (Fugère et al., 2020).  
182  
183 Throughout our experiment, phosphorus (P) and nitrogen (N) were simultaneously  
184 added biweekly to simulate nutrient enrichment at a constant rate, starting on August  
185 10<sup>th</sup>, 7 days before the first sampling day to ensure communities would have passed  
186 their exponential growth phase before the first pulse of pesticides was applied. Our  
187 nutrient treatment included two levels, with target concentrations of 15 µg P/L (hereafter  
188 referred as low-nutrient treatment) typical of mesotrophic Lake Hertel (Thibodeau,  
189 Walsh, & Beisner, 2015) and 60 µg P/L (high-nutrient treatment; eutrophic conditions).  
190 Nutrient solutions were made using nitrate (KNO<sub>3</sub>) and phosphate (KH<sub>2</sub>PO<sub>4</sub> and K<sub>2</sub>PO<sub>4</sub>)  
191 preserving the same N:P molar ratio (33:1) found in Lake Hertel; the target  
192 concentrations were therefore 231 µg N/L and 924 µg N/L for low- and high- nutrient  
193 treatments respectively. Over the course of the experiment, the average total P (TP)  
194 concentration measured in the source lake was 20.4 µg/L (standard error, SE=±1.3) and  
195 the average TP achieved in ponds with no pesticide addition was 13.6 µg/L (SE=±0.71)  
196 and 36.7 µg/L (SE=±10.8) respectively for low- and high-nutrient treatment. The average  
197 total N (TN) concentration was 556.9 µg/L (SE=±60.7) at Lake Hertel, 407.8 µg/L  
198 (SE=±32.7) and 789.0 µg/L (SE=±177.6) respectively in control ponds with low and high  
199 nutrient inputs.  
200

201 Within each nutrient treatment, ponds received varying amounts of the herbicide  
202 glyphosate or the insecticide imidacloprid, separately or in combination, in a regression  
203 design with seven levels of pesticide concentration plus controls with no pesticide  
204 addition (Fig. 1A). The seven levels of target concentration were: 0.04, 0.1, 0.3, 0.7, 2,  
205 5.5 and 15 mg/L for glyphosate and 0.15, 0.4, 1, 3, 8, 22 and 60 µg/L for imidacloprid.  
206 There was no replication for each combination of nutrient and pesticide concentration,  
207 which is compensated by the wide gradient of pesticides concentration established in  
208 the regression design (Fig. 1A). Glyphosate was added in the form of Roundup Super  
209 Concentrate (Monsanto©) and target concentrations calculated based on its glyphosate  
210 acid content, while imidacloprid was added in the form of a solution prepared with pure  
211 imidacloprid powder (Sigma-Aldrich, Oakville, Canada) dissolved in ultrapure water.  
212 Treatment ponds received two pulses of pesticides (at days 6 and 34 of the experiment)  
213 while nutrients were applied biweekly to maintain a press treatment. The target  
214 concentrations of glyphosate and imidacloprid were well correlated with the measured  
215 concentrations in the ponds (Fig. S1A-B) with the exception of a few ponds receiving the  
216 highest imidacloprid dose which reached lower concentrations than intended, especially  
217 after the second pulse (Fig. S1C). These ponds nonetheless reached higher  
218 concentrations than ponds lower on the imidacloprid gradients (i.e., a clear gradient was  
219 established).

220

221 Bacterioplankton communities were sampled at six different timepoints (Fig. 1B): one  
222 before pesticide application (day 1); three between pulse 1 and pulse 2 applications  
223 (days 7, 15, and 30); and two timepoints after the second pulse (days 35 and 43).

224 Pesticide quantification was performed immediately after each pulse application (days 6  
225 and 34) and at two time points between them (days 14 and 29) while nutrients were  
226 quantified on the same days as bacterioplankton except for days one and 35 (Fig. 1B).

227  
228 Water samples for nutrient and microbial community analyses were collected from each  
229 mesocosm with integrated samplers (made of 2.5 cm-wide PVC tubing) and stored in  
230 dark clean 1L Nalgene (Thermo Scientific) bottles triple-washed with pond water. To  
231 avoid cross contamination, we sampled each pond with a separate sampler and bottle.  
232 We kept bottles in coolers while sampling and then moved them to an on-site laboratory,  
233 where they were stored at 4 °C until processing, for no longer than 4 hours. Water  
234 samples for pesticide quantification were collected immediately after pesticide  
235 application (days 6 and 34) in a subset of ponds englobing each gradient and in a  
236 smaller subset between the pulses (days 14 and 29). They were stored in clear Nalgene  
237 bottles (1 L), acidified to a pH < 3 with sulfuric acid and frozen at -20 °C until analysis.

238

### 239 *Nutrient and pesticide quantification*

240 Quantification of TP and TN from unfiltered water samples were processed at the GRIL  
241 (Interuniversity Group in Limnology) analytical laboratory at the Université du Québec à  
242 Montréal following standard protocols as outlined by McComb (2002). Duplicate  
243 subsamples (40 mL) of water sampled from each pond were stored in acid-washed  
244 glass tubes and kept at 4 °C until nutrient concentrations were quantified. TN  
245 concentration was determined using the alkaline persulfate digestion method coupled  
246 with a cadmium reactor (Patton & Kryskalla, 2003) in a continuous flow analyzer (OI

247 Analytical, College Station, TX, USA). TP was estimated based on optical density in a  
248 spectrophotometer (Biocrom Ultrospec 2100pro, Holliston, MA, USA) after persulfate  
249 digestion through the molybdenum blue method (Wetzel & Likens, 2000). Glyphosate  
250 and imidacloprid concentrations were quantified through liquid chromatography coupled  
251 to mass spectrometry using an Accela 600-Orbitrap LTQ XL (LC-HRMS, Thermo  
252 Scientific). The method consisted of heated electrospray ionization (HESI) in negative  
253 mode for glyphosate, acquisition in full scan mode (50-300 m/z) at high resolution  
254 (FTMS = 30,000 m/Dz) and the same LC-HRMS system but using positive HESI mode  
255 for imidacloprid (mass range 50-700m/z). Limits of detection were 1.23 and 1.44 µg/L for  
256 glyphosate and imidacloprid respectively, while quantification thresholds were  
257 respectively 4.06 µg/L, and 4.81 µg/L. Samples falling below limits of detection were pre-  
258 concentrated with a factor of 40X (10 mL samples were reconstituted to 250 µL) and  
259 their final concentration were back-calculated according to the concentration factor.

260

### 261 *Estimating bacterial density through flow cytometry*

262 To estimate the density of bacterial cells, we fixed 1 mL of the 1 L sampled pond water  
263 with glutaraldehyde (1% final concentration) and flash froze this subsample in liquid  
264 nitrogen (Gasol & Del Giorgio, 2000; Ruiz-González et al., 2018). We stored samples at  
265 -80 °C until they were processed via a BD Accuri C6 flow cytometer (BD Biosciences,  
266 San Jose, CA, USA). After samples were thawed at room temperature (18-20 °C), we  
267 prepared dilutions (1:25) with Tris-EDTA buffer (Tris-HCl 10 mM; EDTA 1 mM; pH 8)  
268 and aliquoted in two duplicate tubes. Samples were then stained with Syto13 Green-  
269 Fluorescent Nucleic Acid Stain (0.1 v/v in DMSO; ThermoFisher S7575) and incubated

270 in the dark at room temperature (18-20 °C) for 10 min. To validate the equipment  
271 calibration, we ran BD TruCount Absolute Count Tubes (BD Biosciences) each day,  
272 prior to sample processing. Samples were run until reaching 20,000 events, at a rate of  
273 100-1,000 events/s in slow fluidics (14  $\mu$ L/min). Events within a predefined gate on a 90°  
274 light side scatter (SSC-H) versus green fluorescence (FL1-H) cytogram were used for  
275 cell counts estimation. This inclusive gate was defined to maximize cell counts accuracy  
276 by excluding background noise and large debris. Bacterial density was estimated based  
277 on cell counts detected within the gate, flow volume, and sample dilution. We calculated  
278 the average bacterial density for each pair of analytical duplicates with a coefficient of  
279 variation (CV, i.e., ratio between the standard deviation and average of the duplicate  
280 values) less than 0.08. If the CV was greater than or equal to 0.08, the sample was run  
281 a third time, and the outlying value was discarded before taking the mean of the two  
282 remaining samples.

283

#### 284 *Carbon substrate utilization patterns*

285 We used Biolog EcoPlate® assays (Hayward, CA, USA) to infer community-level  
286 utilization of dissolved organic carbon by microbes. For all treatments (Fig. 1A) and at  
287 each of the six sampled timepoints (Fig. 1B), we added 125  $\mu$ L of unfiltered pond water  
288 to each well of the EcoPlates. Each plate contains, in triplicates, 31 different organic  
289 carbon substrates and water controls. These substrates can be grouped into five main  
290 guilds (amines/amides, amino acids, carbohydrates, carboxylic acetic acids and  
291 polymers), as summarized in Table S2. We measured the optical density at 590 nm in

292 each well as a proxy for microbial carbon substrate use, since it causes a concomitant  
293 reduction of the redox-sensitive tetrazolium dye, whose color intensity is measurable at  
294 this wavelength. Plates were incubated in the dark at room temperature (18-20 °C) and  
295 well absorbance was measured daily until an asymptote was reached (Ruiz-González et  
296 al., 2018; Ruiz-González, Niño-García, Lapierre, & del Giorgio, 2015). For each daily  
297 measurement, an average well color development (AWCD) was calculated. To correct  
298 for variation in inoculum density we selected substrate absorbance values of the plate  
299 measurements with AWCD closest to 0.5 (usually after 3-8 days of incubation) as  
300 suggested in Garland (2001). We then calculated the blank-corrected median  
301 absorbance of each substrate at each sampled timepoint for analyses.

302

### 303 *DNA extraction, 16S rRNA gene amplification and sequencing*

304 We selected a subset of ponds for DNA extraction and subsequent analyses (outlined in  
305 bold in Fig. 1A) to assess bacterioplankton community responses at the extremes and  
306 the middle of the experimental gradient. From each timepoint and nutrient treatment, we  
307 chose two control ponds (beginning of the gradient, no pesticide addition), ponds with  
308 the third lowest concentration (middle of the gradient) of each or both pesticides (1 µg/L  
309 imidacloprid and/or 0.3 mg/L glyphosate), and ponds with the highest concentration (end  
310 of the gradient) used in the experiment for each or both pesticides (60 µg/L imidacloprid  
311 and/or 15 mg/L glyphosate). We selected ponds with high concentrations of pesticides  
312 to maximize the chance of detecting a response from the bacterial community. That  
313 said, we still kept concentrations that fall below available regulatory acceptable  
314 concentrations for glyphosate in North America (Table S1), allowing us to ask whether

315 changes in bacterial communities can be detected at concentrations considered safe for  
316 aquatic eukaryotes in a region where glyphosate is extensively used (Benbrook, 2016;  
317 Simon-Delso et al., 2015). In total, we sampled 16 of the 48 experimental ponds at six  
318 timepoints, yielding a total of 96 samples for 16S rRNA amplicon sequencing (Fig. 1B).  
319 After sampling 1 L of pond water as described above, we immediately filtered 250 mL  
320 through a 0.22  $\mu\text{m}$  pore size Millipore hydrophilic polyethersulfone membrane of 47 mm  
321 diameter (Sigma-Aldrich, St. Louis, USA) and stored filters at -80 °C until DNA  
322 extraction. We extracted and purified total genomic DNA from frozen filters using the  
323 PowerWater DNA Isolation Kit (MoBio Technologies Inc., Vancouver, Canada) following  
324 the manufacturer's protocol, that includes a 5-min vortex agitation of the filter with beads  
325 and lysis buffer to enhance cell lysis. We quantified genomic DNA with a Qubit 2.0  
326 fluorometer (ThermoFisher, Waltham, MA, USA) and used 10 ng to prepare amplicon  
327 libraries for paired-end sequencing (2 x 250 bp) on two Illumina MiSeq (Illumina, San  
328 Diego, CA, USA) runs. We performed a two-step polymerase chain reaction (PCR)  
329 targeting the V4 region of the 16S rRNA gene, with primers U515\_F and E786\_R, as  
330 described in Preheim et al. (2013). Further details on PCR reactions, library preparation  
331 and amplicon sequencing, including positive controls (mock communities) and negative  
332 controls are described in the Supplementary Material.

333  
334 *Sequence data processing*  
335 We used idemp (<https://github.com/yhwu/idemp>) to demultiplex barcoded fastq files from  
336 the sequencing data, and cutadapt to remove remaining Illumina adapters (Martin,



337 2011). The DADA2 package (Callahan et al., 2016) in R was used to filter and trim  
338 reads, using the default filtering parameters with a maximum expected error (maxEE)  
339 score of two. Reads were trimmed on the left to remove primers and those shorter than  
340 200 or 150 bp were discarded, respectively, for forward and reverse reads. DADA2 was  
341 also used to infer amplicon sequence variants (ASVs), remove chimeras and finally  
342 obtain a matrix of ASV counts in each sample for each MiSeq run independently. We  
343 used the default parameters of the “learning error rates” function with the multithread  
344 option enabled. The number of raw reads and non-chimeric reads obtained from each  
345 sample are summarized in Table S3 (average raw reads per sample: 43,159;  
346 SE=2,245). Excluding mock communities, extraction blanks and PCR controls, we  
347 obtained 1,787,412 raw reads in the first run and 4,702,355 in the second run, of which  
348 we retained, respectively, 1,565,021 and 4,188,644 non-chimeric reads. PCR negative  
349 controls and extraction blanks produced 214 non-chimeric reads in total; these were  
350 excluded from downstream analyses as we only included samples with a minimum of  
351 6,000 reads. Of the 30 expected sequences from the custom mock community (Preheim  
352 et al., 2013), DADA2 found 25 exact sequence matches, producing 5 false negatives  
353 and 7 false positives (for a total of 32 sequences). In the ATCC mock, 23 of the 24  
354 expected sequences were found, with only 1 false negative but 10 false positives (for a  
355 total of 33 sequences). We concatenated DADA2 abundance matrices from each MiSeq  
356 run and then used TaxAss (Rohwer, Hamilton, Newton, & McMahon, 2018) to assign  
357 ASV taxonomy with a database specifically curated for freshwater bacterioplankton,  
358 FreshTrain (Newton, Jones, Eiler, McMahon, & Bertilsson, 2011), and GreenGenes  
359 (DeSantis et al., 2006), with a minimum bootstrap support of 80% and 50%,

360 respectively. After performing a multiple sequence alignment with the R package  
361 DECIPHER (Wright, 2016), we constructed a maximum likelihood phylogenetic tree  
362 using the phangorn package following recommendations made by Callahan (2016). For  
363 subsequent analyses, we imported the ASV abundance matrix together with taxonomic  
364 assignments and environmental data as an object in the phyloseq package (McMurdie &  
365 Holmes, 2013) in R. We removed sequence data identified as mitochondria or  
366 chloroplast DNA and normalized read counts using the DESeq2 package (Love, Huber,  
367 & Anders, 2014), which performs a variance stabilizing transformation without discarding  
368 reads or samples (McMurdie & Holmes, 2014), which is important in the context of high  
369 read depth variation, as observed among our samples (Table S3). As normalizations  
370 such as the DESeq2 method tend to reduce the importance of dominant taxa while  
371 inflating the importance of rare taxa (McKnight et al., 2019), for comparison with  
372 DESeq2, we additionally normalized the abundance matrix in two ways: (1) by  
373 calculating relative abundances (proportions) of each ASV, and (2) by rarefying to  
374 10,000 reads (948 ASVs and 7 samples were consequently removed). These two  
375 alternative normalizations are presented in the Supplementary Materials, and are  
376 generally concordant with the DESeq2 results in the main text. For most compositional  
377 analyses in the main text, we calculated the estimated absolute abundance (EAA) of  
378 ASVs per sample by multiplying the DESeq2 normalized ASVs relative abundance by  
379 the total bacterial cell counts found in the sample through flow cytometry (Zhang et al.,  
380 2017).

381

382 *Statistical analyses*

383 To assess resistance and resilience to experimental treatments, we compared changes  
384 in bacterial community density, microbial carbon substrate use, as well as  
385 bacterioplankton community taxonomic structure (richness and composition), as  
386 explained in detail below. We conducted all statistical analyses in R version 3.5.1 (R  
387 Core Team, 2008). As we tested hypotheses of different treatment effects at different  
388 timepoints, we applied a Bonferroni correction for multiple hypothesis testing.

389

#### 390 **Treatment effects on bacterioplankton density**

391 Time series of bacterial density were analyzed with a generalized additive mixed model  
392 (GAMM) with the mgcv R package (Wood, 2017) to quantify the singular and interactive  
393 effects of nutrient and of each pesticide treatment on bacterioplankton density as a  
394 function of time while accounting for nonlinear relationships. Glyphosate and  
395 imidacloprid target concentrations were rescaled (from 0 to 1) to match the scale of the  
396 nutrient treatment factor (binary) and we tested for their effect individually or in  
397 combination. Individual mesocosms (ponds) were included as a random effect (random  
398 smooth) to account for non-independence among measurements from the same pond  
399 over time. Model validation was performed by investigating residual distributions,  
400 comparing fitted and observed values and checking if basis dimensions (k) of smooth  
401 terms were not too low. The model fit (adjusted  $R^2$ ) and further details on predictors  
402 used in the model, including their statistical significance, are provided in Table S4.

403

#### 404 **Treatment effects on carbon substrate use**

405 We quantified treatment effects on the number of carbon substrates used at each pond  
406 and timepoint with a GAMM with the same terms as the GAMM described above for  
407 modeling bacterial density. More details are provided in Table S4. To assess the effects  
408 of the treatments on carbon substrate utilization patterns by microbial communities over  
409 time, we built principal response curves (PRCs) (Auber, Travers-Trolet, Villanueva, &  
410 Ernande, 2017). PRCs are a special case of partial redundancy analysis (pRDA) in  
411 which time and treatments, expressed as ordered factors, are used as explanatory  
412 variables, while community composition is the multivariate response. Time is considered  
413 as a covariable (or conditioning variable) whose effect is partialled out, and changes in  
414 community composition with the treatments over time are always expressed as  
415 deviations from the control pond at each timepoint. PRCs also assess the contribution of  
416 each species to the treatment effect through the taxa weight (also known as species  
417 score) usually displayed in the right y-axis of a PRC diagram (Van den Brink, den  
418 Besten, bij de Vaate, & ter Braak, 2009). The significance of the first PRC axis was  
419 inferred by permuting the treatment label of each pond while keeping the temporal order,  
420 using the permute R package (Simpson, 2019) followed by a permutation test with the  
421 vegan R package (Oksanen et al., 2018). Before performing PRCs we transformed the  
422 community matrix (containing carbon substrate use data) using the Hellinger  
423 transformation (Legendre & Gallagher, 2001). PRC of community carbon utilization  
424 patterns was performed for the 31 substrates individually and grouped into five guilds  
425 (Table S2).

426

427 **Treatment effects on bacterioplankton community taxonomic structure**

428 To infer the impact of treatments on bacterioplankton taxonomic diversity over time, we  
429 calculated alpha diversity as richness (number of observed ASVs) and as the exponent  
430 of the Shannon index (or Hill numbers (Jost, 2006)) of each sample after rarefying the  
431 ASV abundance matrix to 10,000 reads without replacement and modelled their  
432 response to pesticide and nutrient treatments using GAMMs. Model equations, their fit  
433 (adjusted  $R^2$ ) and statistics of significant terms are reported in Table S5. In this analysis,  
434 pesticides treatments were considered factors (low vs. high) because 16S rRNA reads  
435 data were only available for a subset of concentrations (Fig. 1A). Pesticides and nutrient  
436 treatments were coded as ordered factors and models were validated after investigation  
437 of residual distributions, comparison of fitted and observed values and checking if the  
438 basis dimension (k) of smooth terms was sufficiently large.

439  
440 To assess differences in community composition, we calculated weighted UniFrac  
441 distances (Lozupone & Knight, 2005) and Jensen-Shannon divergence (JSD) among  
442 the subset of samples selected for DNA analyses and represented them in principal  
443 coordinate analysis (PCoA) bidimensional plots. These two metrics are complementary  
444 as the first is weighted for phylogenetic branch lengths unique to a particular treatment,  
445 and the second assesses changes in community composition at the finest possible  
446 resolution, tracking ASVs regardless of their phylogenetic relatedness. We performed a  
447 series of permutational analyses of variance (PERMANOVA) based on weighted  
448 UniFrac distances and JSD to test the effect of treatments (as factors) on community  
449 composition at four sampled timepoints separately: at day 1 (before any treatment was  
450 applied), day 7 (immediately after the first pulse), day 15 (11 days after the first pulse),

451 day 30 (immediately before the second pulse) and day 43 (last day of the experiment,  
452 after the second pulse). We also performed an analysis of multivariate homogeneity  
453 (PERMDISP) to test for homoscedasticity in groups dispersions (Anderson, 2006)  
454 because the PERMANOVA may be sensitive to non-homogeneous dispersions within  
455 groups and thus mistake it as among-group variation (Anderson, 2001). A significant  
456 PERMDISP ( $p < 0.05$ ) indicates different within-group dispersions and thus should be  
457 used in combination with visual inspection of the ordination plots to interpret the  
458 PERMANOVA results.

459  
460 Using EAA after read depth normalization with DESeq2, we further visualized  
461 bacterioplankton community temporal shifts with PRCs, asking if the extent of  
462 community turnover varied across phylogenetic levels. Separate models were built for  
463 ASVs grouped at various phylogenetic levels, from phylum to genus. For each PRC  
464 model, we evaluated the proportion of variance (inertia) explained by the conditional  
465 variable (time) and the constrained variable (treatments), as well as the proportion of  
466 explained variance per axis (the eigenvalue of each RDA axis divided by the sum of all  
467 eigenvalues). We used these values to decide which PRC model, if at the phylum, class,  
468 order, family, genus or ASV level, best explained the variation in the data, and we tested  
469 for the significance of the first PRC axis through a permutation test with the permute and  
470 vegan packages in R (Oksanen et al., 2018; Simpson, 2019). Taxa weights representing  
471 the affinity of the most responsive taxa with the treatment response curve are displayed  
472 the right y-axis of each PRC diagram. Before performing each PRC we transformed the  
473 community matrix using the Hellinger transformation (Legendre & Gallagher, 2001).

474  
475 The abundance of the three genera with the highest PRC taxa weights were modeled  
476 with GAMMs to explore how treatments impacted their (potentially non-linear)  
477 abundances over time, and to provide further validation of the treatment effects detected  
478 by PRCs. The GAMM response variable was the log-transformed ( $\log(1+x)$ , where  $x$  is  
479 the variable) EAA of each of the three genera, after reads had been rarefied to 10,000  
480 reads per sample without replacement. We opted for using rarefied data instead of  
481 DESeq2 normalization which is intended for community analyses (Weiss et al., 2017)  
482 and the GAMMs focused on specific taxa of interest. Modeled abundances were  
483 visualized with the R package *itsadug* (Van Rij, Wieling, Baayen, & van Rijn, 2020).

484

## 485 **Results**

486 *Bacterial cell density is weakly affected by glyphosate while microbial community carbon*  
487 *substrate utilization is resistant to all stressors*

488 Overall bacterial cell density showed a strong but non-linear increase over time across  
489 all ponds (GAMM, effect of time:  $F=17.5$ ,  $p<0.001$ , Table S4; Fig. 2). The time-  
490 independent effect of nutrients on bacterial cell density was weak but positive (GAMM,  
491  $t=4.1$ ,  $p<0.001$ ), and, over time, glyphosate had a weak positive effect on bacterial  
492 density (GAMM, factor-smooth interaction between time and glyphosate:  $F=6.6$ ,  
493  $p<0.001$ ) (Table S4). The interactive effect of nutrients and glyphosate was also weak,  
494 and not significant after Bonferroni correction for multiple testing (GAMM,  $F=5.7$ ,  
495 uncorrected  $p=0.018$ , Table S4). Overall, these results indicate that, despite increasing

496 over time across ponds, bacterioplankton densities also slightly increased in response to  
497 nutrient and glyphosate addition.

498

499 The number of carbon substrates used by the microbial community diminished slightly  
500 over time (GAMM,  $F=6.0$ ,  $p<0.001$ , Table S4). However, neither glyphosate,  
501 imidacloprid, nutrients, nor their interactions had significant effects on carbon substrate  
502 utilization as assayed by EcoPlates (Table S4). In addition, the PRC analysis did not  
503 reveal any significant treatment effects on microbial utilization of any of the 31 unique  
504 carbon substrates when considered separately (Fig. 3A; permutation test for the first  
505 constrained eigenvalue,  $F=12.28$   $p=0.295$ ) or when grouped into guilds (Fig. 3B;  
506  $F=34.46$   $p=0.355$ ). To simplify visualization and facilitate comparison with treatments  
507 selected for community taxonomic characterization, the PRCs in Fig. 3 included the  
508 same ponds as those used for DNA analyses. PRCs including all ponds in the tested  
509 gradient showed similar results (Fig. S2A and Fig. S2B). We conclude that, despite  
510 slight changes in the number of substrates being used over time, none of the treatments  
511 significantly affected microbial community-level carbon utilization profiles.

512

513 *Bacterioplankton community structure responses*

514 **Glyphosate has a minor time-independent effect on community diversity and a**  
515 **major effect on community composition over time**

516 We calculated two metrics of bacterioplankton community alpha diversity in each  
517 sample: taxon richness, estimated as the logarithm of the total number of observed  
518 ASVs after rarefying (Fig. 4A), and the exponent of the Shannon index, which combines



519 information about ASV richness and evenness (Fig. 4B). No significant time-dependent  
520 effect of any treatment was detected, although ponds with high glyphosate concentration  
521 (15 mg/L) had a lower Shannon diversity when averaged across all timepoints (GAMM,  
522  $t=-3.51$ ,  $p=0.001$ , Table S5), and the same was observed for ASV richness but with a  
523 non-significant effect after multiple test correction (GAMM,  $t=-2.89$ , uncorrected  
524  $p=0.006$ , Table S5). Overall, the effect of glyphosate on bacterioplankton alpha diversity  
525 was relatively weak and not influenced by time (Table S5).

526  
527 We also tracked changes in bacterioplankton community composition, in two ways: with  
528 weighted UniFrac distance and JSD, both calculated after normalizing read depth per  
529 sample with DESeq2 (or with alternative normalizations described below). We display  
530 these changes in community composition using PCoA, with a separate plot for each  
531 timepoint of the experiment (Fig. 5). Glyphosate explained a significant proportion of the  
532 variation in both metrics of community composition, with  $R^2$  ranging from 0.29 to 0.58,  
533 depending on the time following glyphosate application (PERMANOVA,  $p<0.007$  for both  
534 metrics at all tested timepoints after pesticide pulses, except for weighted UniFrac  
535 distance at day 30, Tables S6 and S7). Nutrients and imidacloprid did not significantly  
536 affect community composition, alone or in combination with other treatments (Tables S6  
537 and S7). Although nutrients appear to have a slight effect on community composition on  
538 day 15 (uncorrected  $p=0.027$  for weighted UniFrac and JSD, Table S6 and Table S7)  
539 and on day 30 (uncorrected  $p=0.055$  for weighted UniFrac, Table S6, and uncorrected  
540  $p=0.013$  for JSD, Table S7), the effect is not significant after Bonferroni correction, and  
541 the explained variance is never as high as it is for glyphosate on the same day ( $R^2=0.12$

542 for both weighted UniFrac and for JSD at both days, Table S6 and Table S7). We  
543 conclude that glyphosate was the dominant driver of compositional changes as it  
544 produced a significant and consistent effect on bacterioplankton communities,  
545 independent of other stressors, on days 7, 15, 30 and 43 according to JSD, and on days  
546 7, 15 and 43 according to weighted UniFrac distance.

547  
548 Alternative read depth normalization methods (ASV relative abundance and rarefied  
549 data; see Methods) produced qualitatively similar results, showing the predominant  
550 effect of glyphosate on community composition (Fig. S3), with a slight delay in the effect  
551 of the first glyphosate pulse compared to the DESeq2 normalization (Fig. 5). The effect  
552 of glyphosate on bacterioplankton community composition is detected regardless of the  
553 data normalization (Table S8), but is more apparent using DESeq2 (compare Fig. 5 to  
554 Fig. S3). This might be because DESeq2 involves a log transformation which reduces  
555 the weight of highly abundant community members (McKnight et al., 2019). If less  
556 abundant taxa are more responsive to glyphosate, this could explain why this effect is  
557 more apparent with DESeq2 normalization.

558  
559 **Bacterioplankton communities recover over time at broad phylogenetic scales**  
560 **from the first glyphosate pulse**

561 On day 30 (24 days after the first pesticide pulse and before the second pulse), the  
562 bacterioplankton community composition in ponds that had been affected (on day 15) by  
563 a high dose of glyphosate (15 mg/L) appeared to recover according to weighted UniFrac  
564 (Fig. 5A), but not when using JSD applied to ASVs (Fig. 5B). Using weighted UniFrac,

565 the effect of glyphosate was visibly weaker on day 30 (Fig. 5A) and at the limit of  
566 significance after Bonferroni correction (PERMANOVA,  $R^2=0.29$ , uncorrected  $p=0.007$ ,  
567 Table S6), but still significant using JSD (PERMANOVA,  $R^2=0.34$ ,  $p=0.001$ , Table S7).  
568 Viewed together, our series of ordinations show that detection of community recovery  
569 depends upon whether phylogenetic information is taken into account. Recovery was  
570 apparent when phylogenetic distance among ASVs was calculated (as measured by  
571 UniFrac distance, on day 30, control and high-glyphosate communities approach each  
572 other, Fig. 5A) but undetected at the ASV level, independent of phylogeny (as measured  
573 by JSD, differences between control and high-glyphosate communities keep significant  
574 on day 30, Fig. 5B). As such, the community appears to be resilient at a broad  
575 phylogenetic level, but not at the finer ASV level, indicating that glyphosate-sensitive  
576 ASVs are replaced with phylogenetically-close relatives.

577  
578 To further assess how resilience varied at different phylogenetic scales, we used PRCs  
579 to track community changes at the phylum and ASV levels (Fig. 6). Given that nutrient  
580 inputs were not major drivers of community composition (Tables S6 and S7), we built  
581 PRCs by combining ponds with the same pesticide treatment, irrespective of nutrient  
582 load. This facilitated the visualization of pesticide effects, while capturing the same  
583 effects as PRCs considering all experimental treatments separately (compare Fig. 6A  
584 and Fig. S4). We further compared PRCs at different phylogenetic scales, from class to  
585 genus level (Fig. S5). PRCs captured a significant amount of the variation in community  
586 responses to pesticide treatments over time (phylum level:  $F=31.22$ , class:  $F=34.28$ ,  
587 order:  $F=26.19$ , family:  $F=21.30$ , genus:  $F=20.6$ , ASV:  $F=10.61$ , all  $p=0.001$ ; Table S9),

588 with greater variation explained at broader taxonomic levels compared to finer levels.  
589 The variance explained by the first PRC axis decreased from 47.7% at the phylum level  
590 to 22.1% at the ASV level (Table S9). At the broadest taxonomic scale (phylum),  
591 communities showed a clear response to high (15 mg/L) but not low (0.3 mg/L)  
592 concentrations of glyphosate, followed by a recovery before the second pulse (Fig. 6A).  
593 Notably, no recovery was observed at the ASV level (Fig. 6B), consistent with the  
594 community composition analysis (Fig. 5). Imidacloprid had no detectable effect at any  
595 concentration, whereas the highest concentration of glyphosate caused the greatest  
596 effect on bacterioplankton communities. Similar response and recovery patterns were  
597 also observed down to the genus level, with progressively weaker recovery at finer  
598 taxonomic scales (Fig. S5). Community composition showed recovery 24 days after the  
599 first pulse of glyphosate, but failed to recover after the second pulse (Fig. 5A and Fig.  
600 6A). While this does not exclude the possibility of an eventual recovery, the duration of  
601 our experiment (which ended nine days after the second pulse) was likely insufficient to  
602 permit subsequent recovery. These results further support that high concentrations of  
603 glyphosate led to long-lasting community shifts at the ASV or genus level, whereas  
604 community resilience can be achieved at broader phylogenetic scales.

605

#### 606 **Dynamics of the taxa most responsive to treatments**

607 The phylum Proteobacteria was the most positively affected by glyphosate (Fig 6A;  
608 Table S10), with relative abundance over 60% in the high glyphosate treatment (15  
609 mg/L) and ~50% or less in other treatments and controls (Table S11). Bacteroidetes,  
610 Actinobacteria and Cyanobacteria were the most negatively affected phyla (Fig. 6A;

611 Table S10, Table S11). Of the ten ASVs with the highest absolute taxa weights, all  
612 belonged to the phylum Proteobacteria (Fig. 6B, Table S12) and, except for sp283 and  
613 sp2111, they were all positively affected by glyphosate. An ASV assigned to the genus  
614 *Agrobacterium* was among the ASVs that responded most positively to high glyphosate  
615 treatment (Fig. 6B; Table S12). The GAMM showed that ASVs assigned to the genus  
616 *Agrobacterium* increased in EAA over time in ponds receiving high doses of glyphosate  
617 (GAMM, factor-smooth interaction between time and high glyphosate treatment:  
618  $F=19.49$ ,  $p<0.001$ , Table S13), or receiving both high glyphosate and imidacloprid  
619 (GAMM, factor-smooth interaction between time and treatment with high concentrations  
620 of both glyphosate and imidacloprid:  $F=20.66$ ,  $p<0.001$ , Table S13). A linear time-  
621 independent effect of glyphosate was also detected in experimental ponds treated with  
622 the highest concentrations of both pesticides together (GAMM,  $t=7.50$ ,  $p<0.001$ , Table  
623 S13) or glyphosate alone (GAMM,  $t=6.25$ ,  $p<0.001$ , Table S13). The modeled  
624 *Agrobacterium* abundance (Fig. S6A) shows a similar 'response followed by recovery'  
625 pattern over time as the overall community response at the phylum level (Fig. 6A),  
626 suggesting that the positive effect of glyphosate on Proteobacteria may be driven by  
627 *Agrobacterium*.

628  
629 The other two most positively affected genera (*Flavobacterium* and *Azospirillum*, Fig.  
630 S5D) increased in abundance in response to the combination of glyphosate at 15 mg/L  
631 and imidacloprid at 60  $\mu\text{g/L}$  (GAMM, factor-smooth interaction between time and  
632 treatment with high concentrations of both glyphosate and imidacloprid on

633 *Flavobacterium*:  $F=17.35$ ,  $p<0.001$ , and on *Azospirillum*:  $F=6.27$   $p=0.001$ , Table S13) or  
634 glyphosate alone at 15 mg/L (GAMM, factor-smooth interaction between time and high  
635 glyphosate treatment on *Flavobacterium*:  $F=3.63$ ,  $p=0.031$ , not significant after  
636 Bonferroni correction; and on *Azospirillum*:  $F=5.41$ ,  $p=0.002$ , Table S13), but the effects  
637 were not as strong as detected for *Agrobacterium* (Table S13). In contrast to the  
638 recovery pattern observed in *Agrobacterium* exposed to both the independent and  
639 combined highest concentrations of glyphosate (Fig. S6A), the modeled abundance of  
640 *Flavobacterium* (Fig. S6B) and *Azospirillum* (Fig. S6C) followed distinct patterns in these  
641 two treatments. *Flavobacterium* responded weakly to high doses of both pesticides,  
642 mainly after the second pulse, whereas *Azospirillum* recovered partially after responding  
643 to the first pulse, but only in ponds treated with the highest concentrations of both  
644 pesticides. Despite the overall strong effect of glyphosate on Proteobacteria, these  
645 results highlight how different bacterioplankton taxa (including *Agrobacterium* and  
646 *Azospirillum* – both Alphaproteobacteria) can show subtly different responses and  
647 recovery patterns to pesticides.

## 648 **Discussion**

### 650 *Context and summary of the experiment*

651 The herbicide glyphosate has been shown to affect aquatic microbial community  
652 structure in a variety of natural environments and experimental setups (Berman et al.,  
653 2020; Lu et al., 2020; Muturi et al., 2017; Stachowski-Haberkorn et al., 2008). Likewise,  
654 the insecticide imidacloprid may disrupt aquatic food webs (Yamamuro et al., 2019), with  
655 potential, yet poorly explored consequences for bacterioplankton. The interactive effects

656 of these pesticides on bacterioplankton – and how they might vary depending on  
657 fertilizer use and lake trophic status – are relevant because such agrochemical mixtures  
658 are common in agriculturally impacted watersheds. Here, we tested how individual and  
659 combined gradients of glyphosate and imidacloprid affected bacterioplankton  
660 communities in aquatic mesocosms receiving different nutrient inputs. Although they are  
661 incomplete representations of natural ecosystems, mesocosm experiments allow us to  
662 manipulate and replicate the exposure of complex lake bacterial communities to  
663 agricultural chemical pollutants commonly found in freshwaters (Alexander, Luiker,  
664 Finley, & Culp, 2016). The current experiment is limited to the response of  
665 bacterioplankton communities derived from a pristine lake. Future studies focusing on  
666 biofilms and sediments could complement our results, as many contaminants  
667 accumulate in lake sediments and may affect the biofilm community structure  
668 (Fernandes et al., 2019; Khadra, Planas, Girard, & Amyot, 2018; Romero et al., 2020).

669

#### 670 *Glyphosate as a driver of community structure*

671 Our data support the prediction that glyphosate would affect bacterioplankton  
672 community structure, which occurred at the highest tested concentration (15 mg/L).  
673 Contrary to expectation, no evident interaction between glyphosate and imidacloprid or  
674 nutrient load was detected in determining either bacterial density or community  
675 structure. High doses of glyphosate resulted in a weak time-independent reduction of  
676 bacterioplankton alpha diversity, and a more pronounced change in community  
677 composition over time. As hypothesized, glyphosate and nutrient treatments slightly  
678 increased bacterial density, suggesting a mild fertilizing effect of glyphosate consistent

679 with it being a potential phosphorus source (Hove-Jensen et al., 2014; Lu et al., 2020).  
680 Most bacterioplankton from a pristine source environment (Lake Hertel) are thus able to  
681 cope with concentrations of imidacloprid as high as 60  $\mu\text{g/L}$  and of glyphosate as high  
682 as 0.3 mg/L, but they may be sensitive to glyphosate concentrations exceeding 15 mg/L.  
683 The regulatory criteria intended for eukaryotes (below 60  $\mu\text{g/L}$  for imidacloprid; Table  
684 S1) were sufficient to preserve bacterioplankton diversity in the experimental conditions  
685 at LEAP. On the other hand, the threshold of 15 mg/L for glyphosate deserves further  
686 attention from regulatory agencies, as this concentration impacted bacterioplankton  
687 composition, which is known to affect lake health and freshwater quality (Kraemer et al.,  
688 2020).

689  
690 Although the highest targeted imidacloprid concentration was not always achieved in all  
691 ponds (Fig. S1), this cannot entirely explain its lack of detectable effect on  
692 bacterioplankton. Community composition of ponds receiving measured concentrations  
693 of imidacloprid as high as 15  $\mu\text{g/L}$  or more did not deviate from controls, confirming a  
694 true lack of effect at least up to that concentration. Alternatively, the absence of a  
695 detectable response might be due in part to rapid degradation of imidacloprid in water,  
696 which fell below the limit of detection between pulses (Fig. S1). The absence of a  
697 bacterioplankton response is also consistent with the weak or undetectable response of  
698 zooplankton biomass to imidacloprid pulses in the same experiment (Hébert et al.,  
699 2021). The invertebrate community in the experimental ponds was mainly composed of  
700 the zooplanktonic groups Cladocera, Copepoda and Rotifera, and only copepods



701 declined over time after pulse 2, with no resulting effect in total zooplankton biomass  
702 (Hébert et al., 2021). Overall, these results indicate that the concentrations of  
703 imidacloprid applied in this experiment were not sufficient to strongly alter either  
704 zooplankton or bacterioplankton biomass or community structure.

705  
706 Our results suggest that two properties of ecological stability – resistance and resilience  
707 – are at play in lake bacterioplankton: functions related to microbial carbon substrate  
708 use are resistant to imidacloprid, glyphosate and their interactions in different nutrient  
709 backgrounds, while bacterioplankton community composition is resilient following  
710 disturbance caused by a glyphosate pulse at 15 mg/L. The recovery of bacterioplankton  
711 community composition was only evident when grouping ASVs at higher (more  
712 inclusive) taxonomic or phylogenetic levels. Glyphosate thus drove a turnover of  
713 bacterioplankton ASVs which, even after the recovery, are different from the ASVs  
714 initially found in the undisturbed community.

715  
716 *Proteobacteria are major responders to glyphosate*  
717 Glyphosate treatments had a strong positive effect on the phylum Proteobacteria,  
718 previously found to be favoured by high concentrations of glyphosate in rhizosphere-  
719 (Newman et al., 2016) and phytoplankton-associated communities (Wang, Lin, Li, Lin, &  
720 Lin, 2017). Multiple species of Proteobacteria can use glyphosate as a source of  
721 phosphorus by breaking its C-P bond (Hove-Jensen et al., 2014). We identified  
722 *Agrobacterium*, a genus of *Rhizobiaceae* containing species known to degrade  
723 glyphosate (Hove-Jensen et al., 2014), as being highly favored in the glyphosate

724 treatment at 15 mg/L. The abundance of ASVs assigned to this genus peaked after each  
725 pulse and decreased before the second pulse, coinciding with the community recovery  
726 observed 24 days after the first perturbation. The ability to degrade glyphosate may be  
727 widespread in the family *Rhizobiaceae* (Liu, McLean, Sookdeo, & Cannon, 1991), and  
728 *Agrobacterium* have also been found to encode glyphosate-resistant EPSPS genes  
729 (Funke et al., 2006). In fact, this genus was used to create glyphosate-resistant crops,  
730 i.e. the so-called 'Roundup-ready technology' (Funke et al., 2006). While glyphosate  
731 may be a stressor for the microbial community at large (e.g., phytoplankton (Fugère et  
732 al., 2020)), it may be a resource for some members such as *Agrobacterium*, who could  
733 potentially detoxify the environment and thus facilitate community recovery after a pulse  
734 perturbation. Further genomic and metagenomic analyses of our experimental samples  
735 could reveal whether these ecological dynamics are underlain by evolutionary  
736 adaptation, and whether community resistance and resilience can be explained by the  
737 initial presence of resistant bacteria in the community, or to *de novo* mutations or gene  
738 transfer events.

739  
740 Glyphosate could have driven changes in the bacterial community via direct  
741 mechanisms (e.g. by affecting species with a sensitive EPSPS, its target enzyme) or  
742 indirect mechanisms (e.g. effects on other trophic levels that cascaded down to bacteria  
743 via predation or other interactions). In a previous study of the same experiment  
744 described here that focused on the responses of eukaryotic phytoplankton, we found  
745 that glyphosate treatment reduced the diversity of phytoplankton, but did not significantly  
746 change phytoplankton community composition (Fugère et al., 2020). Although a reduced

747 phytoplankton diversity could indirectly affect bacterioplankton community composition,  
748 a direct effect of glyphosate on bacteria seems more plausible as the taxa favored by  
749 the treatment (mainly Proteobacteria) have been previously shown to be directly  
750 affected in a similar way (Janßen et al., 2019; Wang et al., 2017). Indeed, bacterial  
751 degradation of glyphosate likely released bioavailable phosphorus, stimulating  
752 phytoplankton growth (Fugère et al., 2020). Further studies will be needed to  
753 disentangle how the effects of pesticides cascade through food webs, and how trophic  
754 structure influences their effects.

755

#### 756 *Functional redundancy in carbon utilization potential*

757 Despite the marked changes in taxonomic composition driven by glyphosate, microbial  
758 communities did not change their carbon substrate use throughout the experiment,  
759 providing evidence for functional redundancy in carbon utilization potential. This was an  
760 expected result, as broad-scale ecosystem functions such as respiration and dissolved  
761 organic carbon consumption are weakly coupled with species composition (Girvan,  
762 Campbell, Killham, Prosser, & Glover, 2005; Langenheder, Lindström, & Tranvik, 2006;  
763 Peter et al., 2011), allowing these functions to remain unaffected by fluctuations in  
764 microbial community composition (Louca et al., 2018). While less diverse communities  
765 (in terms of species richness) may lack functional redundancy, more diverse  
766 communities are expected to encode more redundant functions (Konopka, 2009). We  
767 can thus surmise that the freshwater bacterioplankton communities studied here were  
768 sufficiently diverse to be functionally redundant for carbon utilization in the face of  
769 disturbance. The weak and time-independent effect of high concentrations of glyphosate

770 on alpha diversity was insufficient to alter community carbon substrate use. However,  
771 our experiment was conducted with communities originating from a pristine lake in a  
772 nature reserve, and this result might not be generalized to freshwaters historically  
773 impacted by other forms of anthropogenic stress. For example, land use intensity is  
774 negatively correlated with bacterioplankton richness in lakes across Eastern Canada  
775 (Kraemer et al., 2020). It remains to be seen whether such impacted lakes are less  
776 functionally redundant, and thus possibly more susceptible to impaired ecosystem  
777 functioning. Lastly, although bacterioplankton respiration accounts for a large fraction of  
778 organic carbon processing in freshwaters (Berggren, Lapierre, & del Giorgio, 2012), the  
779 carbon substrate use we measured could also be due in part to fungal activity which  
780 could be compensating or masking changes in bacterioplankton activity. There was no  
781 macroscopically observable fungal growth in the plates, yet microscopic fungi likely  
782 contributed a fraction of the inoculum used to initiate the plates.

783  
784 *The phylogenetic depth of glyphosate resistance: Methodological considerations*  
785 The inference of bacterioplankton ASVs in this study allowed a relatively fine-scale  
786 taxonomic resolution of community changes in response to a pulse perturbation of  
787 glyphosate. Notably, the recovery of bacterioplankton composition was detectable at  
788 broader taxonomic units (e.g. phylum in particular) but not at the ASV level. This implies  
789 that the taxonomic resolution of traits under selection during recovery from a glyphosate  
790 pulse is relatively coarse (Martiny, Jones, Lennon, & Martiny, 2015). This result could  
791 also be explained if ASVs are too fine-scale as a measure of diversity, and mostly reflect  
792 sequencing or base calling errors rather than true biological diversity. We deem this

793 unlikely, first because the ASV inference algorithm includes a model-based approach to  
794 correct for amplicon sequencing errors (Callahan et al., 2016), and second because  
795 ASV detection methods are usually more accurate than OTU-clustering methods based  
796 on sequence similarity thresholds of usually 97% (Caruso, Song, Asquith, & Karstens,  
797 2019). For example, we only found 7 to 10 false-positive ASVs (Methods), but dozens to  
798 hundreds of false positive are detected by even state-of-the-art (distribution-based)  
799 sequence clustering-based methods to identify operational taxonomic units, when  
800 applied to the same or similar mock communities as used here (Tromas et al., 2017).  
801 Although we cannot exclude the impact of possible false ASVs on our results, we expect  
802 them to be relatively minimal and evenly distributed across all timepoints (Callahan,  
803 McMurdie, & Holmes, 2017). In other words, there is no reason to believe that  
804 sequencing errors should be non-randomly distributed over time or across experimental  
805 treatments. Moreover, PRC analyses show a steady decline from the phylum level to the  
806 genus level in both the response to, and recovery from, high concentrations of  
807 glyphosate. Therefore, even without considering the ASV level, there is still a discernible  
808 pattern of greater community resilience at broader taxonomic scales. This suggests that  
809 the traits (and underlying genes) required for survival or growth in the presence of  
810 glyphosate are relatively deeply conserved. Higher-resolution genomic or metagenomic  
811 analyses could be used to confirm this result, and pinpoint the genes involved in  
812 resistance.

813

814 *Ecosystem resistance, resilience and stability*

815 Our study provides evidence of ecosystem stability in terms of carbon substrate use  
816 maintained by microbial communities when faced by a perturbation by two of the most  
817 commonly used pesticides in the world, separately or in combination. We also showed  
818 resistance to a wide gradient of imidacloprid contamination, and resilience to high doses  
819 of glyphosate in bacterioplankton communities that have no known history of contact  
820 with the herbicide. Finally, whether a stressed community is considered resilient  
821 depends on the phylogenetic depth of the traits required to deal with the stress (Martiny  
822 et al., 2015). Our results provide an example of how resilience to stressors can be a  
823 feature of deeper phylogenetic groups, but not finer-scale groupings (ASVs), which  
824 could be involved in adaptation to other stressors or niches.

825

## 826 **Acknowledgments**

827 We are grateful to D. Maneli, C. Normandin, A. Arkilanian and T. Jagadeesh for their  
828 assistance in the field, to J. Marleau, C. Girard, O.M. Pérez-Carrascal and N. Tromas for  
829 their assistance during laboratory analyses, to K. Velghe for nutrient analyses and to  
830 M.A.P. Castro for developing the LC–MS method for pesticides quantification. We thank  
831 the three anonymous reviewers for comments on a previous version of this manuscript.

832

## 833 **Funding information**

834 This study was supported by a Canada Research Chair and NSERC Discovery Grant to  
835 B.J.S. N.B.C. was funded by FRQNT and NSERC-CREATE/GRIL fellowships. V.F. was  
836 supported by an NSERC postdoctoral fellowship. M-P.H. was funded by NSERC and  
837 NSERC-CREATE/GRIL. C.C.Y.X. was funded by a Vanier Canada Graduate

838 Scholarship. R.D.H.B. was supported by a Canada Research Chair. LEAP was built and  
839 operated with funds from a CFI Leaders Opportunity Fund, NSERC Discovery Grant and  
840 the Liber Ero Chair to A.G.

841

## 842 **References**

- 843 Alexander, A. C., Luiker, E., Finley, M., & Culp, J. M. (2016). Mesocosm and Field  
844 Toxicity Testing in the Marine Context. In *Marine Ecotoxicology* (pp. 239–256).  
845 Elsevier Inc. <https://doi.org/10.1016/b978-0-12-803371-5.00008-4>
- 846 Alexander, A. C., Luis, A. T., Culp, J. M., Baird, D. J., & Cessna, A. J. (2013). Can  
847 nutrients mask community responses to insecticide mixtures? *Ecotoxicology*, *22*(7),  
848 1085–1100. <https://doi.org/10.1007/s10646-013-1096-3>
- 849 Allison, S. D., & Martiny, J. B. H. (2008). Resistance, resilience, and redundancy in  
850 microbial communities. *Proceedings of the National Academy of Sciences of the*  
851 *USA*, *105*, 11512–11519. <https://doi.org/10.1073/pnas.0801925105>
- 852 Altenburger, R., Backhaus, T., Boedeker, W., Faust, M., & Scholze, M. (2013).  
853 Simplifying complexity: Mixture toxicity assessment in the last 20 years.  
854 *Environmental Toxicology and Chemistry*, *32*(8), 1685–1687.  
855 <https://doi.org/10.1002/etc.2294>
- 856 Anderson, M. J. (2001). A new method for non-parametric multivariate analysis of  
857 variance, *26*, 32–46.
- 858 Anderson, M. J. (2006). Distance-based tests for homogeneity of multivariate  
859 dispersions. *Biometrics*, *62*(1), 245–253. <https://doi.org/10.1111/j.1541-0420.2005.00440.x>
- 860
- 861 Auber, A., Travers-Trolet, M., Villanueva, M.-C., & Ernande, B. (2017). A new application  
862 of principal response curves for summarizing abrupt and cyclic shifts of  
863 communities over space. *Ecosphere*, *8*(12), e02023.  
864 <https://doi.org/10.1002/ecs2.2023>
- 865 Baker, L. F., Mudge, J. F., Thompson, D. G., Houlihan, J. E., & Kidd, K. A. (2016). The  
866 combined influence of two agricultural contaminants on natural communities of  
867 phytoplankton and zooplankton. *Ecotoxicology*, *25*(5), 1021–1032.  
868 <https://doi.org/10.1007/s10646-016-1659-1>
- 869 Beauséjour, R., Handa, I. T., Lechowicz, M. J., Gilbert, B., & Vellend, M. (2015).  
870 Historical anthropogenic disturbances influence patterns of non-native earthworm  
871 and plant invasions in a temperate primary forest. *Biological Invasions*, *17*(4),  
872 1267–1281. <https://doi.org/10.1007/s10530-014-0794-y>
- 873 Benbrook, C. M. (2016). Trends in glyphosate herbicide use in the United States and  
874 globally. *Environmental Sciences Europe*, *28*(1), 1–15.  
875 <https://doi.org/10.1186/s12302-016-0070-0>
- 876 Berggren, M., Lapierre, J. F., & del Giorgio, P. A. (2012). Magnitude and regulation of  
877 bacterioplankton respiratory quotient across freshwater environmental gradients.  
878 *The ISME Journal*, *6*(5), 984–993. <https://doi.org/10.1038/ismej.2011.157>



- 879 Berman, M. C., Llames, M. E., Minotti, P., Fermani, P., Quiroga, M. V., Ferraro, M. A., ...  
880 Zagarese, H. E. (2020). Field evidence supports former experimental claims on the  
881 stimulatory effect of glyphosate on picocyanobacteria communities. *Science of the*  
882 *Total Environment*, 701, 134601. <https://doi.org/10.1016/j.scitotenv.2019.134601>
- 883 Birk, S., Chapman, D., Carvalho, L., Spears, B. M., Andersen, H. E., Argillier, C., ...  
884 Hering, D. (2020). Impacts of multiple stressors on freshwater biota across spatial  
885 scales and ecosystems. *Nature Ecology & Evolution*, 4(8), 1060–1068.  
886 <https://doi.org/10.1038/s41559-020-1216-4>
- 887 Bloomfield, J. P., Williams, R. J., Goody, D. C., Cape, J. N., & Guha, P. (2006).  
888 Impacts of climate change on the fate and behaviour of pesticides in surface and  
889 groundwater—a UK perspective. *Science of the Total Environment*, 369(1–3), 163–  
890 177. <https://doi.org/10.1016/j.scitotenv.2006.05.019>
- 891 Callahan, B., McMurdie, P., Rosen, M., Han, A. W., Johnson, A. J. A., & Holmes, S. P.  
892 (2016). DADA2: High-resolution sample inference from Illumina amplicon data.  
893 *Nature Methods*, 13(7), 581–583. <https://doi.org/10.1038/nmeth.3869>
- 894 Callahan, Ben J., Sankaran, K., Fukuyama, J. A., McMurdie, P. J., & Holmes, S. P.  
895 (2016). Bioconductor workflow for microbiome data analysis: From raw reads to  
896 community analyses. *F1000Research*, 5(1492), 1–49.  
897 <https://doi.org/10.12688/f1000research.8986.2>
- 898 Callahan, Benjamin J, McMurdie, P. J., & Holmes, S. P. (2017). Exact sequence  
899 variants should replace operational taxonomic units in marker-gene data analysis.  
900 *The ISME Journal*, 1–5. <https://doi.org/10.1038/ismej.2017.119>
- 901 Carpenter, S. R., Caraco, N. F., Correll, D. L., Howarth, R. W., Sharpley, A. N., & Smith,  
902 V. H. (1998). Nonpoint pollution of surface waters with phosphorus and nitrogen.  
903 *Ecological Application*, 8(January 1998), 559–568. [https://doi.org/10.1890/1051-0761\(1998\)008\[0559:NPOSWW\]2.0.CO;2](https://doi.org/10.1890/1051-0761(1998)008[0559:NPOSWW]2.0.CO;2)
- 904  
905 Carpenter, S. R., Stanley, E. H., & Vander Zanden, M. J. (2011). State of the world's  
906 freshwater ecosystems: Physical, chemical, and biological changes. *Annual Review*  
907 *of Environment and Resources*, 36, 75–99. <https://doi.org/10.1146/annurev-environ-021810-094524>
- 908  
909 Caruso, V., Song, X., Asquith, M., & Karstens, L. (2019). Performance of Microbiome  
910 Sequence Inference Methods in Environments with Varying Biomass. *MSystems*,  
911 4(1), 1–19. <https://doi.org/10.1128/msystems.00163-18>
- 912 CCME. (2007). *Canadian Water Quality Guidelines for Protection of Aquatic Life:*  
913 *Imidacloprid. Scientific Supporting Document.* Winnipeg, Manitoba.
- 914 CCME. (2012). *Canadian Water Quality Guidelines for the Protection of Aquatic Life:*  
915 *Glyphosate. Scientific Supporting Document.* Winnipeg, Manitoba.
- 916 Cedergreen, N., & Rasmussen, J. J. (2017). Low dose effects of pesticides in the  
917 aquatic environment. In *ACS Symposium Series* (Vol. 1249, pp. 167–187).  
918 <https://doi.org/10.1021/bk-2017-1249.ch012>
- 919 Chará-Serna, A. M., Epele, L. B., Morrissey, C. A., & Richardson, J. S. (2019). Nutrients  
920 and sediment modify the impacts of a neonicotinoid insecticide on freshwater  
921 community structure and ecosystem functioning. *Science of the Total Environment*,  
922 692, 1291–1303. <https://doi.org/10.1016/j.scitotenv.2019.06.301>
- 923 DeLorenzo, M. E., Scott, G. I., & Ross, P. E. (2001). Toxicity of pesticides to aquatic



- 924 microorganisms: A review. *Environmental Toxicology and Chemistry*, 20(1), 84–98.  
925 <https://doi.org/10.1002/etc.5620200108>
- 926 DeSantis, T. Z., Hugenholtz, P., Larsen, N., Rojas, M., Brodie, E. L., Keller, K., ...  
927 Andersen, G. L. (2006). Greengenes, a chimera-checked 16S rRNA gene database  
928 and workbench compatible with ARB. *Applied and Environmental Microbiology*,  
929 72(7), 5069–5072. <https://doi.org/10.1128/AEM.03006-05>
- 930 EFSA. (2014). *Conclusion on the peer review of the pesticide risk assessment for*  
931 *aquatic organisms for the active substance imidacloprid*. *EFSA Journal* (Vol. 12).  
932 <https://doi.org/10.2903/j.efsa.2013.3066>
- 933 EFSA. (2016). *Conclusion on the peer review of the pesticide risk assessment of the*  
934 *active substance glyphosate*. *EFSA Journal* (Vol. 13).  
935 <https://doi.org/10.2903/j.efsa.2015.4302>
- 936 EPA. (2019). Aquatic Life Benchmarks and Ecological Risk Assessments for Registered  
937 Pesticides. Retrieved from [https://www.epa.gov/pesticide-science-and-assessing-](https://www.epa.gov/pesticide-science-and-assessing-pesticide-risks/aquatic-life-benchmarks-and-ecological-risk#ref_4)  
938 [pesticide-risks/aquatic-life-benchmarks-and-ecological-risk#ref\\_4](https://www.epa.gov/pesticide-science-and-assessing-pesticide-risks/aquatic-life-benchmarks-and-ecological-risk#ref_4)
- 939 Falkowski, P. G., Fenchel, T., & Delong, E. F. (2008). The microbial engines that drive  
940 earth's biogeochemical cycles. *Science*, 320(5879), 1034–1039.  
941 <https://doi.org/10.1126/science.1153213>
- 942 Fernandes, G., Carolina, V., Camotti, M., Gerónimo, E. De, Labanowski, J., Damian, O.,  
943 ... Rheinheimer, D. (2019). Indiscriminate use of glyphosate impregnates river  
944 epilithic biofilms in southern Brazil. *Science of the Total Environment*, 651, 1377–  
945 1387. <https://doi.org/10.1016/j.scitotenv.2018.09.292>
- 946 Flood, S. L., & Burkholder, J. A. M. (2018). Imbalanced nutrient regimes increase  
947 *Prymnesium parvum* resilience to herbicide exposure. *Harmful Algae*, 75, 57–74.  
948 <https://doi.org/10.1016/j.hal.2018.04.006>
- 949 Fugère, V., Hébert, M., Barbosa da Costa, N., Xu, C. C. Y., Barrett, R. D. H., Beisner, B.  
950 E., ... Gonzalez, A. (2020). Community rescue in experimental phytoplankton  
951 communities facing severe herbicide pollution. *Nature Ecology & Evolution*, 4, 578–  
952 588. <https://doi.org/10.1038/s41559-020-1134-5>
- 953 Funke, T., Han, H., Healy-Fried, M. L., Fischer, M., & Schönbrunn, E. (2006). Molecular  
954 basis for the herbicide resistance of Roundup Ready crops. *Proceedings of the*  
955 *National Academy of Sciences of the USA*, 103(35), 13010–13015.  
956 <https://doi.org/10.1073/pnas.0603638103>
- 957 Garland, J. L., Mills, A. L., & Young, J. S. (2001). Relative effectiveness of kinetic  
958 analysis vs single point readings for classifying environmental samples based on  
959 community-level physiological profiles (CLPP). *Soil Biology and Biochemistry*, 33(7–  
960 8), 1059–1066. [https://doi.org/10.1016/S0038-0717\(01\)00011-6](https://doi.org/10.1016/S0038-0717(01)00011-6)
- 961 Gasol, J. M., & Del Giorgio, P. A. (2000). Using flow cytometry for counting natural  
962 planktonic bacteria and understanding the structure of planktonic bacterial  
963 communities. *Scientia Marina*, 64(2), 197–224.  
964 <https://doi.org/10.3989/scimar.2000.64n2197>
- 965 Geyer, R. L., Smith, G. R., & Rettig, J. E. (2016). Effects of Roundup formulations,  
966 nutrient addition, and Western mosquitofish (*Gambusia affinis*) on aquatic  
967 communities. *Environmental Science and Pollution Research*, 23(12), 11729–  
968 11739. <https://doi.org/10.1007/s11356-016-6381-2>

- 969 Girvan, M., Campbell, C., Killham, K., Prosser, J., & Glover, L. (2005). Bacterial diversity  
970 promotes community stability and functional resilience after perturbation.  
971 *Environmental Microbiology*, 7(3), 301–313. [https://doi.org/10.1111/j.1462-](https://doi.org/10.1111/j.1462-2920.2004.00695.x)  
972 [2920.2004.00695.x](https://doi.org/10.1111/j.1462-2920.2004.00695.x)
- 973 Healy-Fried, M. L., Funke, T., Priestman, M. A., Han, H., & Scho, E. (2007). Structural  
974 Basis of Glyphosate Tolerance Resulting from Mutations of Pro 101 in *Escherichia*  
975 *coli*. *The Journal of Biological Chemistry*, 282(45), 32949–32955.  
976 <https://doi.org/10.1074/jbc.M705624200>
- 977 Hébert, M.-P., Fugère, V., Beisner, B. E., Barbosa da Costa, N., Barrett, R. D. H., Bell,  
978 G., ... Fussmann, G. F. (2021). Widespread agrochemicals differentially affect  
979 zooplankton biomass and community structure. *Ecological Applications*.  
980 <https://doi.org/10.1002/eap.2423>
- 981 Hébert, M.-P., Fugère, V., & Gonzalez, A. (2018). The overlooked impact of rising  
982 glyphosate use on phosphorus loading in agricultural watersheds. *Frontiers in*  
983 *Ecology and the Environment*, 3, 1–9. <https://doi.org/10.1002/fee.1985>
- 984 Hénault-Ethier, L., Lucotte, M., Moingt, M., Paquet, S., Maccario, S., Smedbol, É., ...  
985 Labrecque, M. (2017). Herbaceous or *Salix miyabeana* 'SX64' narrow buffer strips  
986 as a means to minimize glyphosate and aminomethylphosphonic acid leaching from  
987 row crop fields. *Science of the Total Environment*, 598, 1177–1186.  
988 <https://doi.org/10.1016/j.scitotenv.2017.04.104>
- 989 Hove-Jensen, B., Zechel, D. L., & Jochimsen, B. (2014). Utilization of glyphosate as  
990 phosphate source: biochemistry and genetics of bacterial carbon-phosphorus lyase.  
991 *Microbiology and Molecular Biology Reviews*: MMBR, 78(1), 176–197.  
992 <https://doi.org/10.1128/MMBR.00040-13>
- 993 Janßen, R., Skeff, W., Werner, J., Wirth, M. A., Kreikemeyer, B., Schulz-Bull, D., &  
994 Labrenz, M. (2019). A Glyphosate Pulse to Brackish Long-Term Microcosms Has a  
995 Greater Impact on the Microbial Diversity and Abundance of Planktonic Than of  
996 Biofilm Assemblages. *Frontiers in Marine Science*, 6(December), 1–17.  
997 <https://doi.org/10.3389/fmars.2019.00758>
- 998 Jeppesen, E., Kronvang, B., Meerhoff, M., Søndergaard, M., Hansen, K. M., Andersen,  
999 H. E., ... Olesen, J. E. (2009). Climate Change Effects on Runoff, Catchment  
1000 Phosphorus Loading and Lake Ecological State, and Potential Adaptations. *Journal*  
1001 *of Environment Quality*, 38(5), 1930. <https://doi.org/10.2134/jeq2008.0113>
- 1002 Jeschke, P., & Nauen, R. (2008). Neonicotinoids – from zero to hero in insecticide  
1003 chemistry. *Pest Management Science*, 64, 1100–1106.  
1004 <https://doi.org/10.1002/ps.1631>
- 1005 Jost, L. (2006). Entropy and diversity. *Oikos*, 113(2), 363–375.
- 1006 Keatley, B. E., Bennett, E. M., Macdonald, G. K., Taranu, Z. E., & Gregory-Eaves, I.  
1007 (2011). Land-Use Legacies Are Important Determinants of Lake Eutrophication in  
1008 the Anthropocene. *PLOS One*, 6(1), e15913.  
1009 <https://doi.org/10.1371/journal.pone.0015913>
- 1010 Khadra, M., Planas, D., Girard, C., & Amyot, M. (2018). Age matters: Submersion period  
1011 shapes community composition of lake biofilms under glyphosate stress. *Facets*,  
1012 3(1), 934–951. <https://doi.org/10.1139/facets-2018-0019>
- 1013 Konopka, A. (2009). What is microbial community ecology? *The ISME Journal*, 3(11),

- 1014 1223–1230. <https://doi.org/10.1038/ismej.2009.88>
- 1015 Kraemer, S. A., Barbosa da Costa, N., Shapiro, B. J., Fradette, M., Huot, Y., & Walsh, D.  
1016 A. (2020). A large-scale assessment of lakes reveals a pervasive signal of land use  
1017 on bacterial communities. *The ISME Journal*. [https://doi.org/10.1038/s41396-020-](https://doi.org/10.1038/s41396-020-0733-0)  
1018 [0733-0](https://doi.org/10.1038/s41396-020-0733-0)
- 1019 Langenheder, S., Lindström, E. S., & Tranvik, L. J. (2006). Structure and function of  
1020 bacterial communities emerging from different sources under identical conditions.  
1021 *Applied and Environmental Microbiology*, *72*(1), 212–220.  
1022 <https://doi.org/10.1128/AEM.72.1.212-220.2006>
- 1023 Legendre, P., & Gallagher, E. D. (2001). Ecologically meaningful transformations for  
1024 ordination of species data. *Oecologia*, *129*, 271–280.  
1025 <https://doi.org/10.1007/s004420100716>
- 1026 Liu, C. M., McLean, P. A., Sookdeo, C. C., & Cannon, F. C. (1991). Degradation of the  
1027 herbicide glyphosate by members of the family Rhizobiaceae. *Applied and*  
1028 *Environmental Microbiology*, *57*(6), 1799–1804.
- 1029 Louca, S., Polz, M. F., Mazel, F., Albright, M. B. N., Huber, J. A., Connor, M. I. O., ...  
1030 Parfrey, L. W. (2018). Function and functional redundancy in microbial systems.  
1031 *Nature Ecology & Evolution*, *2*, 936–943. [https://doi.org/10.1038/s41559-018-0519-](https://doi.org/10.1038/s41559-018-0519-1)  
1032 [1](https://doi.org/10.1038/s41559-018-0519-1)
- 1033 Love, M. I., Huber, W., & Anders, S. (2014). Moderated estimation of fold change and  
1034 dispersion for RNA-seq data with DESeq2. *Genome Biology*, *15*(550).  
1035 <https://doi.org/10.1186/s13059-014-0550-8>
- 1036 Lozano, R. B., & Pratt, J. R. (1994). Interaction of toxicants and communities: The role  
1037 of nutrients. *Environmental Toxicology and Chemistry*, *13*(3), 361–368.  
1038 <https://doi.org/10.1002/etc.5620130302>
- 1039 Lozupone, C., & Knight, R. (2005). UniFrac: a New Phylogenetic Method for  
1040 Comparing Microbial Communities. *Applied and Environmental Microbiology*,  
1041 *71*(12), 8228–8235. <https://doi.org/10.1128/AEM.71.12.8228>
- 1042 Lu, T., Xu, N., Zhang, Q., Zhang, Z., Debognies, A., Zhou, Z., ... Qian, H. (2020).  
1043 Understanding the influence of glyphosate on the structure and function of  
1044 freshwater microbial community in a microcosm. *Environmental Pollution*, *260*,  
1045 114012. <https://doi.org/10.1016/j.envpol.2020.114012>
- 1046 Martin, M. (2011). Cutadapt removes adapter sequences from high-throughput  
1047 sequencing reads. *EMBnet.Journal*, *17*, 10–12.
- 1048 Martiny, J. B. H., Jones, S. E., Lennon, J. T., & Martiny, A. C. (2015). Microbiomes in  
1049 light of traits: a phylogenetic perspective. *Science*, *350*(6261), aac9323.  
1050 <https://doi.org/10.1126/science.aac9323>
- 1051 McComb, A. J. (2002). *Limnological Analyses. Lakes and Reservoirs: Research and*  
1052 *Management* (Vol. 7). <https://doi.org/10.1046/j.1440-1770.2002.01722.x>
- 1053 McKnight, D. T., Huerlimann, R., Bower, D. S., Schwarzkopf, L., Alford, R. A., & Zenger,  
1054 K. R. (2019). Methods for normalizing microbiome data: An ecological perspective.  
1055 *Methods in Ecology and Evolution*, *10*(3), 389–400. [https://doi.org/10.1111/2041-](https://doi.org/10.1111/2041-210X.13115)  
1056 [210X.13115](https://doi.org/10.1111/2041-210X.13115)
- 1057 McMurdie, P. J., & Holmes, S. (2013). phyloseq: An R Package for Reproducible  
1058 Interactive Analysis and Graphics of Microbiome Census Data. *PLOS One*, *8*(4),

- 1059 e61217. <https://doi.org/10.1371/journal.pone.0061217>
- 1060 McMurdie, P. J., & Holmes, S. (2014). Waste not, want not: why rarefying Microbiome  
1061 data is inadmissible. *PLOS Computational Biology*, *10*(4), e1003531.  
1062 <https://doi.org/10.1371/journal.pcbi.1003531>
- 1063 Morrissey, C. A., Mineau, P., Devries, J. H., Sanchez-Bayo, F., Liess, M., Cavallaro, M.  
1064 C., & Liber, K. (2015). Neonicotinoid contamination of global surface waters and  
1065 associated risk to aquatic invertebrates: A review. *Environment International*, *74*,  
1066 291–303. <https://doi.org/10.1016/j.envint.2014.10.024>
- 1067 Muturi, E. J., Donthu, R. K., Fields, C. J., Moise, I. K., & Kim, C. (2017). Effect of  
1068 pesticides on microbial communities in container aquatic habitats. *Scientific*  
1069 *Reports*, (November 2016), 1–10. <https://doi.org/10.1038/srep44565>
- 1070 Newman, M. M., Hoilett, N., Lorenz, N., Dick, R. P., Liles, M. R., Ramsier, C., &  
1071 Kloepper, J. W. (2016). Glyphosate effects on soil rhizosphere-associated bacterial  
1072 communities. *Science of the Total Environment*, *543*, 155–160.  
1073 <https://doi.org/10.1016/j.scitotenv.2015.11.008>
- 1074 Newton, R. J., Jones, S. E., Eiler, A., McMahon, K. D., & Bertilsson, S. (2011). A Guide  
1075 to the Natural History of Freshwater Lake Bacteria. *Microbiology and Molecular*  
1076 *Biology Reviews*, *75*(1), 14–49. <https://doi.org/10.1128/MMBR.00028-10>
- 1077 Oksanen, A. J., Blanchet, F. G., Kindt, R., Legendre, P., Minchin, P. R., Hara, R. B. O.,  
1078 ... Wagner, H. (2018). Vegan: community ecology package. R package version 2.4-  
1079 6. [https://doi.org/ISBN 0-387-95457-0](https://doi.org/ISBN%200-387-95457-0)
- 1080 Paerl, H. W., Otten, T. G., & Kudela, R. (2018). Mitigating the Expansion of Harmful  
1081 Algal Blooms Across the Freshwater-to-Marine Continuum. *Environmental Science*  
1082 *and Technology*, *52*(10), 5519–5529. <https://doi.org/10.1021/acs.est.7b05950>
- 1083 Patton, C. J., & Kryskalla, J. R. (2003). *Methods of Analysis by the U.S. Geological*  
1084 *Survey National Water Quality Laboratory—Evaluation of Alkaline Persulfate*  
1085 *Digestion as an Alternative to Kjeldahl Digestion for Determination of Total and*  
1086 *Dissolved Nitrogen and Phosphorus in Water*. USGS.
- 1087 Peter, H., Beier, S., Bertilsson, S., Lindström, E. S., Langenheder, S., & Tranvik, L. J.  
1088 (2011). Function-specific response to depletion of microbial diversity. *The ISME*  
1089 *Journal*, *5*(2), 351–361. <https://doi.org/10.1038/ismej.2010.119>
- 1090 Piggott, J. J., Niyogi, D. K., Townsend, C. R., & Matthaei, C. D. (2015). Multiple  
1091 stressors and stream ecosystem functioning: Climate warming and agricultural  
1092 stressors interact to affect processing of organic matter. *Journal of Applied Ecology*,  
1093 *52*(5), 1126–1134. <https://doi.org/10.1111/1365-2664.12480>
- 1094 Pollegioni, L., Schonbrunn, E., & Siehl, D. (2011). Molecular basis of glyphosate  
1095 resistance: Different approaches through protein engineering. *The FEBS Journal*,  
1096 *278*(16), 2753–2766. <https://doi.org/10.1111/j.1742-4658.2011.08214.x>
- 1097 Preheim, S. P., Perrotta, A. R., Martin-platero, A. M., Gupta, A., & Alm, E. J. (2013).  
1098 Distribution-Based Clustering: Using Ecology To Refine the Operational  
1099 Taxonomic Unit. *Applied and Environmental Microbiology*, *79*(21), 6593–6603.  
1100 <https://doi.org/10.1128/AEM.00342-13>
- 1101 R Core Team. (2008). R: A Language and Environment for Statistical Computing. In *R*  
1102 *Foundation for Statistical Computing* (Vol. 1, pp. 1–2630). R Foundation for  
1103 Statistical Computing. <https://doi.org/10.1007/978-3-540-74686-7>



- 1104 Rainio, M. J., Ruuskanen, S., Helander, M., Saikkonen, K., Saloniemi, I., & Puigbò, P.  
1105 (2021). Adaptation of bacteria to glyphosate: a microevolutionary perspective of the  
1106 enzyme 5-enolpyruvylshikimate-3-phosphate synthase. *Environmental Microbiology*  
1107 *Reports*, 00. <https://doi.org/10.1111/1758-2229.12931>
- 1108 Relyea, R. A. (2009). A cocktail of contaminants: How mixtures of pesticides at low  
1109 concentrations affect aquatic communities. *Oecologia*, 159(2), 363–376.  
1110 <https://doi.org/10.1007/s00442-008-1213-9>
- 1111 Roberts, T., & Hutson, D. (1999). *Metabolic Pathways of Agrochemicals. Part 2:*  
1112 *Insecticides and Fungicides*. (T. R. Roberts, D. H. Hutson, P. W. Lee, P. H. Nicholls,  
1113 & J. R. Plimmer, Eds.), *The Royal Society of Chemistry*. Cambridge: The Royal  
1114 Society of Chemistry. <https://doi.org/10.1017/CBO9781107415324.004>
- 1115 Rohwer, R. R., Hamilton, J. J., Newton, R. J., & McMahon, K. D. (2018). TaxAss:  
1116 Leveraging a Custom Freshwater Database Achieves Fine-Scale Taxonomic  
1117 Resolution. *MSphere*, 3(5), 1–14. <https://doi.org/10.1128/msphere.00327-18>
- 1118 Romero, F., Acuña, V., & Sabater, S. (2020). Multiple stressors determine community  
1119 structure and estimated function of river biofilm bacteria. *Applied and Environmental*  
1120 *Microbiology*, 86(12), 1–13. <https://doi.org/10.1128/AEM.00291-20>
- 1121 Ruiz-González, C., Archambault, E., Laforest-Lapointe, I., Del Giorgio, P. A., Kembel, S.  
1122 W., Messier, C., ... Beisner, B. E. (2018). Soils associated to different tree  
1123 communities do not elicit predictable responses in lake bacterial community  
1124 structure and function. *FEMS Microbiology Ecology*, 94(8), 1–15.  
1125 <https://doi.org/10.1093/femsec/fiy115>
- 1126 Ruiz-González, C., Niño-García, J. P., Lapierre, J.-F., & del Giorgio, P. A. (2015). The  
1127 quality of organic matter shapes the functional biogeography of bacterioplankton  
1128 across boreal freshwater ecosystems. *Global Ecology and Biogeography*, 24,  
1129 1487–1498. <https://doi.org/10.1111/geb.12356>
- 1130 Shade, A., Peter, H., Allison, S. D., Baho, D. L., Berga, M., Bürgmann, H., ...  
1131 Handelsman, J. (2012). Fundamentals of microbial community resistance and  
1132 resilience. *Frontiers in Microbiology*, 3(DEC), 1–19.  
1133 <https://doi.org/10.3389/fmicb.2012.00417>
- 1134 Simon-Delso, N., Amaral-Rogers, V., Belzunces, L. P., Bonmatin, J. M., Chagnon, M.,  
1135 Downs, C., ... Wiemers, M. (2015). Systemic insecticides (Neonicotinoids and  
1136 fipronil): Trends, uses, mode of action and metabolites. *Environmental Science and*  
1137 *Pollution Research*, 22(1), 5–34. <https://doi.org/10.1007/s11356-014-3470-y>
- 1138 Simpson, M. G. L. (2019). permute: Functions for Generating Restricted Permutations of  
1139 Data. R package version 0.9-5. Retrieved from [https://cran.r-](https://cran.r-project.org/package=permute)  
1140 [project.org/package=permute](https://cran.r-project.org/package=permute)
- 1141 Smedbol, É., Lucotte, M., Labrecque, M., Lepage, L., & Juneau, P. (2017).  
1142 Phytoplankton growth and PSII efficiency sensitivity to a glyphosate-based  
1143 herbicide (Factor 540®). *Aquatic Toxicology*, 192(September), 265–273.  
1144 <https://doi.org/10.1016/j.aquatox.2017.09.021>
- 1145 Smith, V. H., Joye, S. B., & Howarth, R. W. (2006). Eutrophication of freshwater and  
1146 marine ecosystems. *Limnology and Oceanography*, 51(1), 351–355.
- 1147 Smith, V. H., & Schindler, D. W. (2009). Eutrophication science: where do we go from  
1148 here? *Trends in Ecology and Evolution*, 24(4), 201–207.

- 1149 <https://doi.org/10.1016/j.tree.2008.11.009>
- 1150 Song, X. P., Hansen, M. C., Stehman, S. V., Potapov, P. V., Tyukavina, A., Vermote, E.  
1151 F., & Townshend, J. R. (2018). Global land change from 1982 to 2016. *Nature*,  
1152 *560*(7720), 639–643. <https://doi.org/10.1038/s41586-018-0411-9>
- 1153 Springmann, M., Clark, M., Mason-D'Croz, D., Wiebe, K., Bodirsky, B. L., Lassaletta, L.,  
1154 ... Willett, W. (2018). Options for keeping the food system within environmental  
1155 limits. *Nature*, *562*(7728), 519–525. <https://doi.org/10.1038/s41586-018-0594-0>
- 1156 Stachowski-Haberhorn, S., Becker, B., Marie, D., Haberhorn, H., Coroller, L., & de la  
1157 Broise, D. (2008). Impact of Roundup on the marine microbial community, as shown  
1158 by an in situ microcosm experiment. *Aquatic Toxicology*, *89*(4), 232–241.  
1159 <https://doi.org/10.1016/j.aquatox.2008.07.004>
- 1160 Starr, A. V., Bargu, S., Maiti, K., & DeLaune, R. D. (2017). The Effect of Atrazine on  
1161 Louisiana Gulf Coast Estuarine Phytoplankton. *Archives of Environmental  
1162 Contamination and Toxicology*, *72*(2), 178–188. [https://doi.org/10.1007/s00244-  
1163 016-0335-z](https://doi.org/10.1007/s00244-016-0335-z)
- 1164 Stehle, S., & Schulz, R. (2015). Agricultural insecticides threaten surface waters at the  
1165 global scale. *Proceedings of the National Academy of Sciences of the USA*,  
1166 *112*(18), 5750–5755. <https://doi.org/10.1073/pnas.1500232112>
- 1167 Thibodeau, G., Walsh, D. A., & Beisner, B. E. (2015). Rapid eco-evolutionary responses  
1168 in perturbed phytoplankton communities. *Proceedings of the Royal Society B*, *282*,  
1169 20151215. <https://doi.org/10.1098/rspb.2015.1215>
- 1170 Thompson, M. S. A., Bankier, C., Bell, T., Dumbrell, A. J., Gray, C., Ledger, M. E., ...  
1171 Woodward, G. (2016). Gene-to-ecosystem impacts of a catastrophic pesticide spill:  
1172 testing a multilevel bioassessment approach in a river ecosystem. *Freshwater  
1173 Biology*, *61*(12), 2037–2050. <https://doi.org/10.1111/fwb.12676>
- 1174 Tilman, D., Fargione, J., Wolff, B., D'Antonio, C., Dobson, A., Howarth, R., ...  
1175 Swackhamer, D. (2001). Forecasting agriculturally driven global environmental  
1176 change. *Science*, *292*(5515), 281–284. <https://doi.org/10.1126/science.1057544>
- 1177 Tromas, N., Fortin, N., Bedrani, L., Terrat, Y., Cardoso, P., Bird, D., ... Shapiro, B. J.  
1178 (2017). *Characterising and predicting cyanobacterial blooms in an 8-year amplicon  
1179 sequencing time course. The ISME Journal* (Vol. 11).  
1180 <https://doi.org/10.1038/ismej.2017.58>
- 1181 van Bruggen, A. H. C., He, M. M., Shin, K., Mai, V., Jeong, K. C., Finch, M. R., &  
1182 Morris, J. J. (2018). Environmental and health effects of the herbicide glyphosate.  
1183 *Science of The Total Environment*, *617*, 255–268.  
1184 <https://doi.org/10.1016/j.scitotenv.2017.10.309>
- 1185 Van den Brink, P. J., den Besten, P. J., bij de Vaate, A., & ter Braak, C. J. F. (2009).  
1186 Principal response curves technique for the analysis of multivariate biomonitoring  
1187 time series. *Environmental Monitoring and Assessment*, *152*, 271–281.  
1188 <https://doi.org/10.1007/s10661-008-0314-6>
- 1189 Van Rij, J., Wieling, M., Baayen, H. R., & van Rijn, H. (2020). Interpreting Time Series  
1190 and Autocorrelated Data Using GAMMs Author.
- 1191 Vörösmarty, C. J., McIntyre, P. B., Gessner, M. O., Dudgeon, D., Prusevich, A., Green,  
1192 P., ... Davies, P. M. (2010). Global threats to human water security and river  
1193 biodiversity. *Nature*, *467*(7315), 555–561. <https://doi.org/10.1038/nature09440>

- 1194 Wang, C., Lin, X., Li, L., Lin, L., & Lin, S. (2017). Glyphosate Shapes a Dinoflagellate-  
1195 Associated Bacterial Community While Supporting Algal Growth as Sole  
1196 Phosphorus Source. *Frontiers in Microbiology*, 8(2530).  
1197 <https://doi.org/10.3389/fmicb.2017.02530>
- 1198 Weiss, S., Xu, Z. Z., Peddada, S., Amir, A., Bittinger, K., Gonzalez, A., ... Knight, R.  
1199 (2017). Normalization and microbial differential abundance strategies depend upon  
1200 data characteristics. *Microbiome*, 5(1), 27. [https://doi.org/10.1186/s40168-017-](https://doi.org/10.1186/s40168-017-0237-y)  
1201 [0237-y](https://doi.org/10.1186/s40168-017-0237-y)
- 1202 Wetzel, R. G., & Likens, G. E. (2000). *Limnological Analyses*. Springer Science &  
1203 *Business Media* (3rd ed., Vol. 7). New York, New York, USA.  
1204 <https://doi.org/10.1046/j.1440-1770.2002.01722.x>
- 1205 Wood, S. (2017). *Generalized Additive Models* (2nd ed.). New York: Chapman and  
1206 Hall/CRC. Retrieved from <https://doi.org/10.1201/9781315370279>
- 1207 Wright, E. S. (2016). Using DECIPHER v2.0 to analyze big biological sequence data in  
1208 R. *The R Journal*, 8(1), 352–359. <https://doi.org/10.32614/rj-2016-025>
- 1209 Yamamuro, M., Komuro, T., Kamiya, H., Kato, T., Hasegawa, H., & Kameda, Y. (2019).  
1210 Neonicotinoids disrupt aquatic food webs and decrease fishery yields. *Science*,  
1211 366(6465), 620–623. <https://doi.org/10.1126/science.aax3442>
- 1212 Zhang, Z., Qu, Y., Li, S., Feng, K., Wang, S., Cai, W., ... Deng, Y. (2017). Soil bacterial  
1213 quantification approaches coupling with relative abundances reflecting the changes  
1214 of taxa. *Scientific Reports*, 7(1), 1–11. <https://doi.org/10.1038/s41598-017-05260-w>

1215  
1216  
1217  
1218

### Data accessibility

1219 Sequence data corresponding to raw 16S rRNA reads and metadata, as well as carbon  
1220 substrate utilization dataset based on Biolog EcoPlates assessment, are available on  
1221 <https://figshare.com/projects/MEC-LEAP/78297>. Sequences of 16S rRNA reads are also  
1222 available at NCBI SRA (BioProject ID PRJNA664121).

1223

### Author contributions

1224 N.B.C., V.F., M.-P.H., R.D.H.B., B.E.B., G.B., G.F.F., B.J.S. and A.G. designed the  
1225 study. N.B.C., V.F. and M.-P.H. collected the data. N.B.C., C.C.Y.X. and V. Y.  
1226 contributed to the development of laboratory methods. N.B.C. and V.F. analysed data.  
1227

1228 N.B.C. made the figures and drafted the manuscript. N.B.C. and B.J.S. wrote the first  
1229 manuscript draft and all authors contributed significantly to data interpretation and  
1230 commented on manuscript drafts.

1231

## 1232 **Figure captions**

1233 **Fig. 1 Experimental design and sampling timeline.** A) In total, 48 mesocosms  
1234 (ponds) at the Large Experimental Array of Ponds (LEAP) at the Gault Nature Reserve  
1235 were filled with 1,000 L of pristine lake water and received two pulses of the pesticides  
1236 glyphosate and imidacloprid, alone or in combination, at two different nutrient  
1237 enrichment scenarios. Each box represents an experimental pond and those outlined in  
1238 bold indicate ponds sampled for DNA extraction and 16S rRNA gene amplicon  
1239 sequencing. B) The experiment lasted 43 days and pesticides were applied on days 6  
1240 (pulse 1) and 34 (pulse 2). Dates of sampling for each variable are indicated with points.  
1241 Nutrients were added every two weeks at a constant dose, starting seven days before  
1242 the first sampling day.

1243

1244 **Fig. 2 Bacterial cell density dynamics during the experiment.** Total bacterial density  
1245 is plotted over time in ponds with low- or high- nutrient enrichment. Dashed vertical lines  
1246 indicate days of pesticide pulses application. Ponds with both glyphosate and  
1247 imidacloprid follow the same gradient pattern as treatments with either of these  
1248 pesticides applied alone.

1249

1250 **Fig. 3 Microbial community carbon substrate utilization.** Principal response curves



1251 (PRCs) of selected experimental treatments show no significant difference between  
1252 controls and pesticide treatments when microbial communities are described according  
1253 to (A) their ability to metabolize 31 different carbon substrates when analysed  
1254 individually or (B) when grouped into guilds. Weights of each tested compound or guild  
1255 are shown along the Y axis (right). Dashed vertical lines indicate days of pesticides  
1256 pulses application. For ease of comparison, the PRCs were calculated based on the  
1257 subset of samples for which DNA was extracted. The PRC displayed in (A) explains  
1258 15.1% of the variation while the one displayed in (B) explains 42.2%, suggesting that  
1259 grouping substrates into guilds improves the explanatory power of the PRC.

1260  
1261 **Fig. 4 Bacterioplankton alpha diversity variation across experimental treatments**  
1262 **over time**, calculated as (A) the (log transformed) observed number of ASVs per  
1263 sample and as (B) the exponent of Shannon index. Dashed vertical lines indicate days  
1264 of pesticides pulses application.

1265  
1266 **Fig. 5 PCoA ordinations of bacterioplankton community composition in response**  
1267 **to experimental treatments**, based on (A) weighted UniFrac distance or (B) Jensen-  
1268 Shannon divergence calculated on ASV estimated absolute abundances after a DESeq2  
1269 normalization. Dashed vertical lines indicate days of pesticides pulses application. Each  
1270 sampling day is plotted in a separate panel to facilitate visualization of treatment effects  
1271 on community composition, mainly driven by high glyphosate (15 mg/L).

1272  
1273 **Fig. 6 PRCs showing the effect of pesticide treatments over time relative to**

1274 **control ponds** at (A) the phylum level or (B) the ASV level. Dashed vertical lines  
1275 indicate days of pesticides pulses application. Only phyla with weights >0.2 and ASVs  
1276 with weight >0.1 are plotted on the right Y axis to facilitate visualization. The finest  
1277 available annotated level of taxonomic assignment of each ASV is indicated in panel B.  
1278 Low- and high-nutrient treatments were grouped together for clarity, but follow the same  
1279 pattern when considered separately (Fig. S4). See Fig. S5 for PRCs at other taxonomic  
1280 levels. These analyses were based on ASV estimated absolute abundances after a  
1281 DESeq2 normalization.

1282

### 1283 **Supplementary figures captions**

1284 **Fig. S1** Experimental gradient established for (A) glyphosate and (B) imidacloprid  
1285 concentrations between two application pulses (at days 6 and 34) and (C) the  
1286 correlation between target and measured concentrations at each pulse. The top row of  
1287 figure C shows results for glyphosate, and the bottom two rows for imidacloprid, after  
1288 pulse 1 (left column) and pulse 2 (right column) respectively.

1289

1290 **Fig. S2** PRC plots show no effect of experimental treatments on community metabolic  
1291 profiles when considering (A) the 31 different compounds individually ( $F=32.6$   $p=0.69$ ) or  
1292 (B) grouped according to functional guilds ( $F=79.2$   $p=0.86$ ). The PRC axis shown in A  
1293 explains 13.4% of total variance and in B 43.1%.

1294

1295 **Fig. S3** PCoA ordinations based on (A, B) weighted UniFrac distance or (B, D) Jensen-  
1296 Shannon divergence exploring different normalization approaches: (A, C) calculation of

1297 reads relative abundance and (B, D) rarefying to a threshold of 10,000 reads per  
1298 sample. Each sampling day is plotted separately to facilitate visualization of treatment  
1299 effects on community composition.

1300  
1301 **Fig. S4** PRCs show how high glyphosate treatments affected community composition at  
1302 (A) phylum and (B) ASV levels. Low- and high-nutrient treatments show the same  
1303 pattern, and, for this reason, they were grouped in Fig. 4, to facilitate data visualization.  
1304 The finest level of taxonomic assignment based on FreshTrain and GreenGenes  
1305 database is shown following ASV names in panel B. Only taxa with weights higher than  
1306 0.2 are shown in A and higher than 0.095 are shown in B.

1307  
1308 **Fig. S5** PRCs show how high glyphosate treatments (15 mg/L) affected community  
1309 composition at different taxonomic levels: (A) class, (B) order, (C) family/lineage, (D)  
1310 genus/clade. Taxonomic assignment based on FreshTrain and GreenGenes databases.  
1311 Low and high nutrient treatments were grouped as they follow the same pattern. Only  
1312 taxa with weights higher than 0.2 are shown.

1313  
1314 **Fig. S6** Summed effects of GAMMs on abundance of three genera most positively  
1315 affected by the glyphosate treatments: (A) *Agrobacterium*, (B) *Flavobacterium* and (C)  
1316 *Azospirillum*. Shades indicate a confidence interval of 95%. Abundance of each genus is  
1317 the estimated absolute abundance of all ASVs assigned to *Agrobacterium*,  
1318 *Flavobacterium* or *Azospirillum* after normalization by rarefying each sample to 10,000  
1319 reads without replacement.

1320 **Supplementary tables captions**

1321 **Table S1** Regulatory acceptable concentrations (RACs) of glyphosate and imidacloprid  
1322 residues in freshwater according to regulatory agencies in Canada (CCME, Canadian  
1323 Council of Ministers of the Environment), Europe (EFSA, European Food Safety  
1324 Agency) and in the USA (EPA, Environmental Protection Agency). Chronic (long-term)  
1325 and acute (short-term) exposure RACs are specified when available.

1326

1327 **Table S2** Carbon substrates present in Biolog EcoPlates and their respective grouping  
1328 (guild)

1329

1330 **Table S3** Barcode sequences of the reverse primer used in step 2 PCR, and total read  
1331 counts obtained after sample demultiplexing. The number of non-chimeric reads  
1332 obtained after filtering, denoising, merging paired ends and removing chimeras with  
1333 DADA2, is also shown.

1334

1335 **Table S4** Summarized results of the generalized additive mixed models (GAMMs) for  
1336 bacterial density and number of carbon substrate used as a response variables. A  
1337 Gaussian residual distribution was used for both models. For each response variable we  
1338 report the sample size (n), adjusted R<sup>2</sup>, the predictors used in the model, the parameter  
1339 estimate and respective standard error (SE) of parametric effects or the effective  
1340 degrees of freedom (EDF) of smooth terms, the corresponding test statistics (*t* value for  
1341 parametric and F for smooth terms) and the *p*-value. Smooths terms are described as  
1342 mgcv syntax: 's()' functions are thin plate regression splines and 'ti()' tensor product

1343 interactions, pond represents the random variable of the mixed model and 'bs='fs'  
1344 specifies the underline base function as a random smooth. Following a Bonferroni  
1345 multiple testing correction for 9 tests, we only considered significant variables with  
1346 unadjusted  $p$ -value  $<0.005$  (shown in bold).

1347  
1348 **Table S5** Summarized results of the generalized additive mixed models (GAMMs) for  
1349 alpha diversity: observed ASV and exponential Shannon. Gaussian residual distributions  
1350 were used in all models. For each response variable we report the sample size ( $n$ ),  
1351 adjusted  $R^2$ , the predictors and factors used in the model, the parameter estimate and  
1352 respective standard error (SE) of parametric effects or the effective degrees of freedom  
1353 (EDF) of smooth terms, the corresponding test statistics ( $t$  value for parametric and  $F$  for  
1354 smooth terms) and the  $p$ -value. Smooths terms are described as mgcv syntax: 's()'   
1355 functions are thin plate regression splines and 'ti()' tensor product interactions, pond  
1356 represents the random variable of the mixed model and 'bs='fs' specifies the underline  
1357 base function as a random smooth. Following a Bonferroni multiple testing correction for  
1358 16 tests, we only considered significant variables with  $p$ -value  $<0.003$ , shown in bold.

1359  
1360 **Table S6** PERMANOVA for different explanatory variables (and their interaction) in  
1361 models with the weighted UniFrac distances among communities as the response. The  
1362 same model was tested at five different time points and an asterisk indicates  $p$ -values  
1363 that are significant after a Bonferroni correction for 7 hypothesis tests (i.e.  $p$ -values  
1364  $<0.007$  are considered significant, shown in bold). A PERMDISP was performed to  
1365 confirm homogeneity of groups dispersions and significant  $p$ -values ( $<0.05$ ) point out to

1366 predictors whose significance in the PERMANOVA output should be carefully analysed  
1367 as they may be a result of within-group variation rather than among-group variation.  
1368 df=degrees of freedom

1369  
1370 **Table S7** PERMANOVA for different explanatory variables (and their interaction) in  
1371 models with the Jensen-Shannon divergence among communities as the response. The  
1372 same model was tested at five different time points and an asterisk indicates  $p$ -values  
1373 that are significant after a Bonferroni correction for 7 hypothesis tests (i.e. only  $p$ -values  
1374  $<0.007$  are considered significant, shown in bold). A PERMDISP was performed to  
1375 confirm homogeneity of groups dispersions and significant  $p$ -values ( $<0.05$ ) point out to  
1376 predictors whose significance in the PERMANOVA output should be carefully analysed  
1377 as they may be a result of within-group variation rather than among-group variation.  
1378 df=degrees of freedom

1379  
1380 **Table S8** PERMANOVA for glyphosate as the explanatory variable in models with  
1381 weighted UniFrac distance or Jensen-Shannon divergence among communities as the  
1382 response variable after data transformation by ASV relative abundance calculation  
1383 (unrarefied) or by rarefying samples to 10,000 reads. The same model was tested at five  
1384 different time points and an asterisk indicates  $p$ -values that are significant after a  
1385 conservative Bonferroni correction for 7 hypothesis tests (i.e. only  $p$ -value $<0.007$  are  
1386 considered significant). A PERMDISP was performed to confirm homogeneity of groups  
1387 dispersions and significant  $p$ -values ( $<0.05$ ) point out to predictors whose significance in  
1388 the PERMANOVA output should be carefully analysed as they may be a result of within-

1389 group variation rather than among-group variation.

1390

1391 **Table S9** Percent of variance explained by the two first PRC axes, and by time or  
1392 treatment when nutrient treatments are grouped as replicates (see Fig. 6 and Fig. S5). F  
1393 statistic and *p*-value of permutation test for first constrained eigenvalue is also shown,  
1394 and an asterisk denote significant *p*-values.

1395

1396 **Table S10** All bacterioplankton taxa weights for the PRC model at the phylum level,  
1397 ranked from largest (positive effects of glyphosate treatment) to smallest (negative  
1398 effects of glyphosate treatment).

1399

1400 **Table S11** Relative abundance of the main affected phyla by treatment. Percentage was  
1401 calculated after normalization with DESeq2 or by rarefying samples to 10,000 reads  
1402 each and the respective standard error is indicated in parenthesis.

1403

1404 **Table S12** ASVs with the highest PRC taxa weights, and their respective weight in the  
1405 first RDA axis, the ratio between this value and the maximum taxa weight of the PRC  
1406 model, and their taxonomy assignment from TaxAss using FreshTrain and GreenGenes  
1407 databases.

1408

1409 **Table S13** Summarized results of the generalized additive mixed models (GAMMs) for  
1410 abundance of the three genera most positively impacted by the experimental treatments.

1411 Gaussian residual distributions were used in all models. For each response variable we

1412 report the sample size ( $n$ ), adjusted R<sup>2</sup>, the predictors and factors used in the model,  
1413 the parameter estimate and respective standard error (SE) of parametric effects or the  
1414 effective degrees of freedom (EDF) of smooth terms, the corresponding test statistics ( $t$   
1415 value for parametric and F for smooth terms) and the  $p$ -value. Smooths terms are  
1416 described as mgcv syntax: 's()' functions are thin plate regression splines and 't()' tensor  
1417 product interactions, pond represents the random variable of the mixed model and  
1418 'bs="fs"' specifies the underline base function as a random smooth. Following a  
1419 Bonferroni multiple testing correction for 16 tests, we only considered significant  
1420 variables with  $p$ -value <0.003, shown in bold.



**A**

Glyphosate (mg/L)

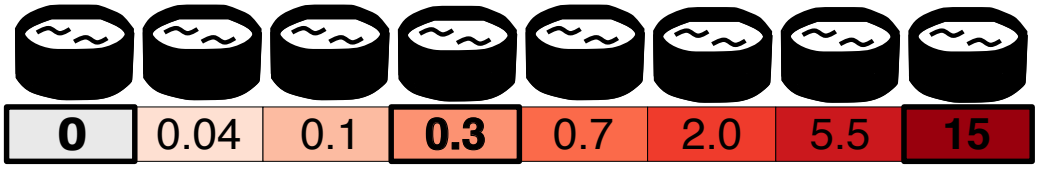Imidacloprid ( $\mu\text{g/L}$ )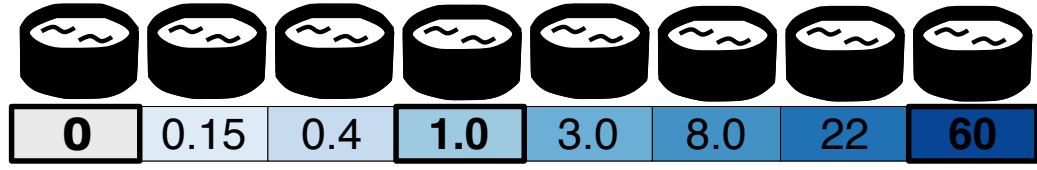Glyphosate (mg/L) and imidacloprid ( $\mu\text{g/L}$ )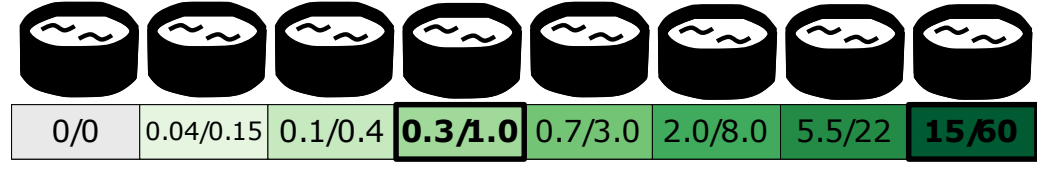

Replicated in  
low and high  
nutrient  
backgrounds

**B**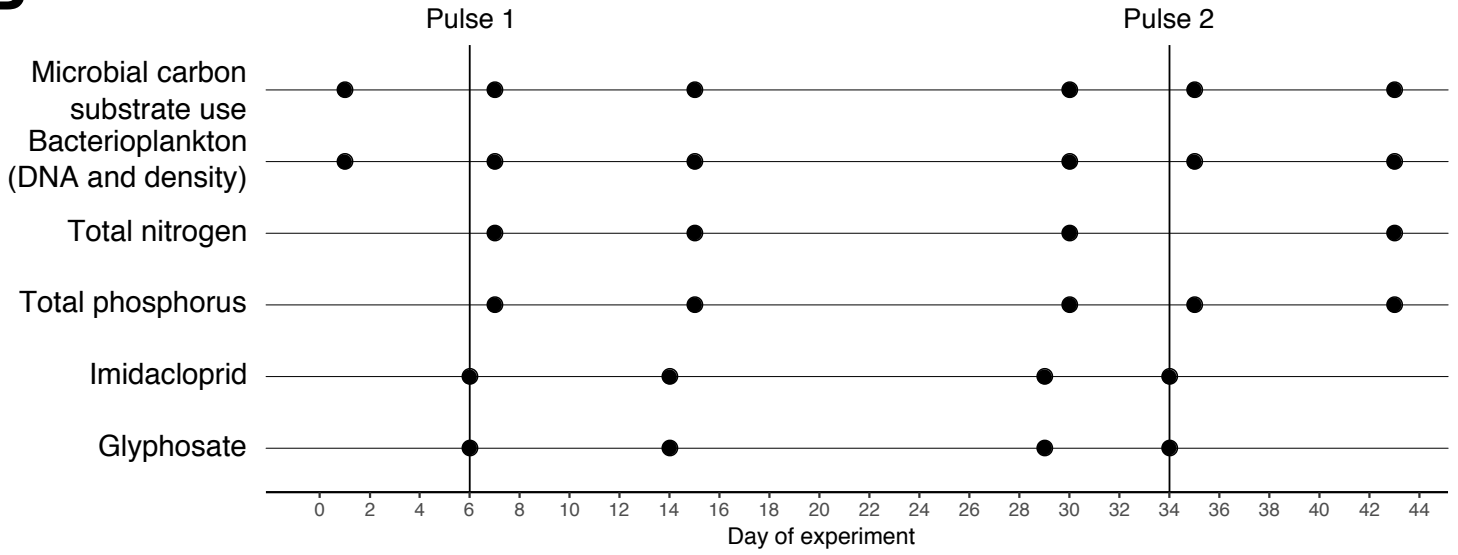

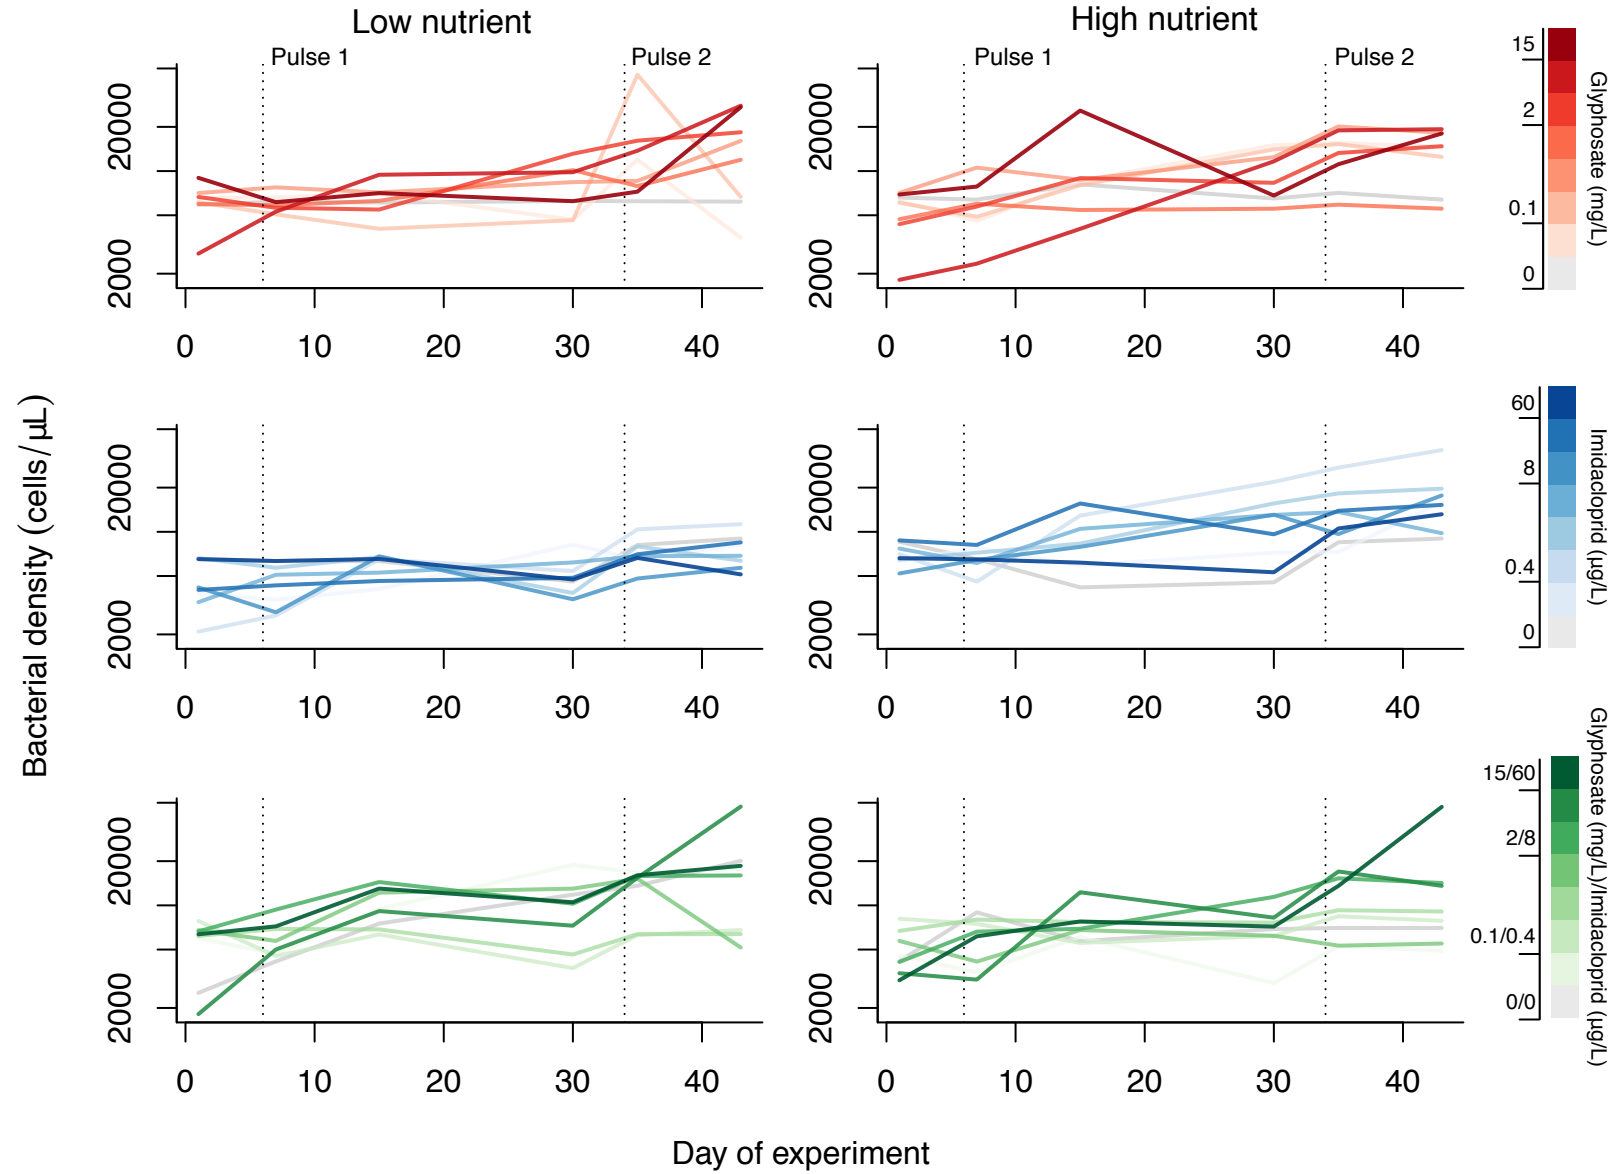

**A** Microbial community carbon substrates use

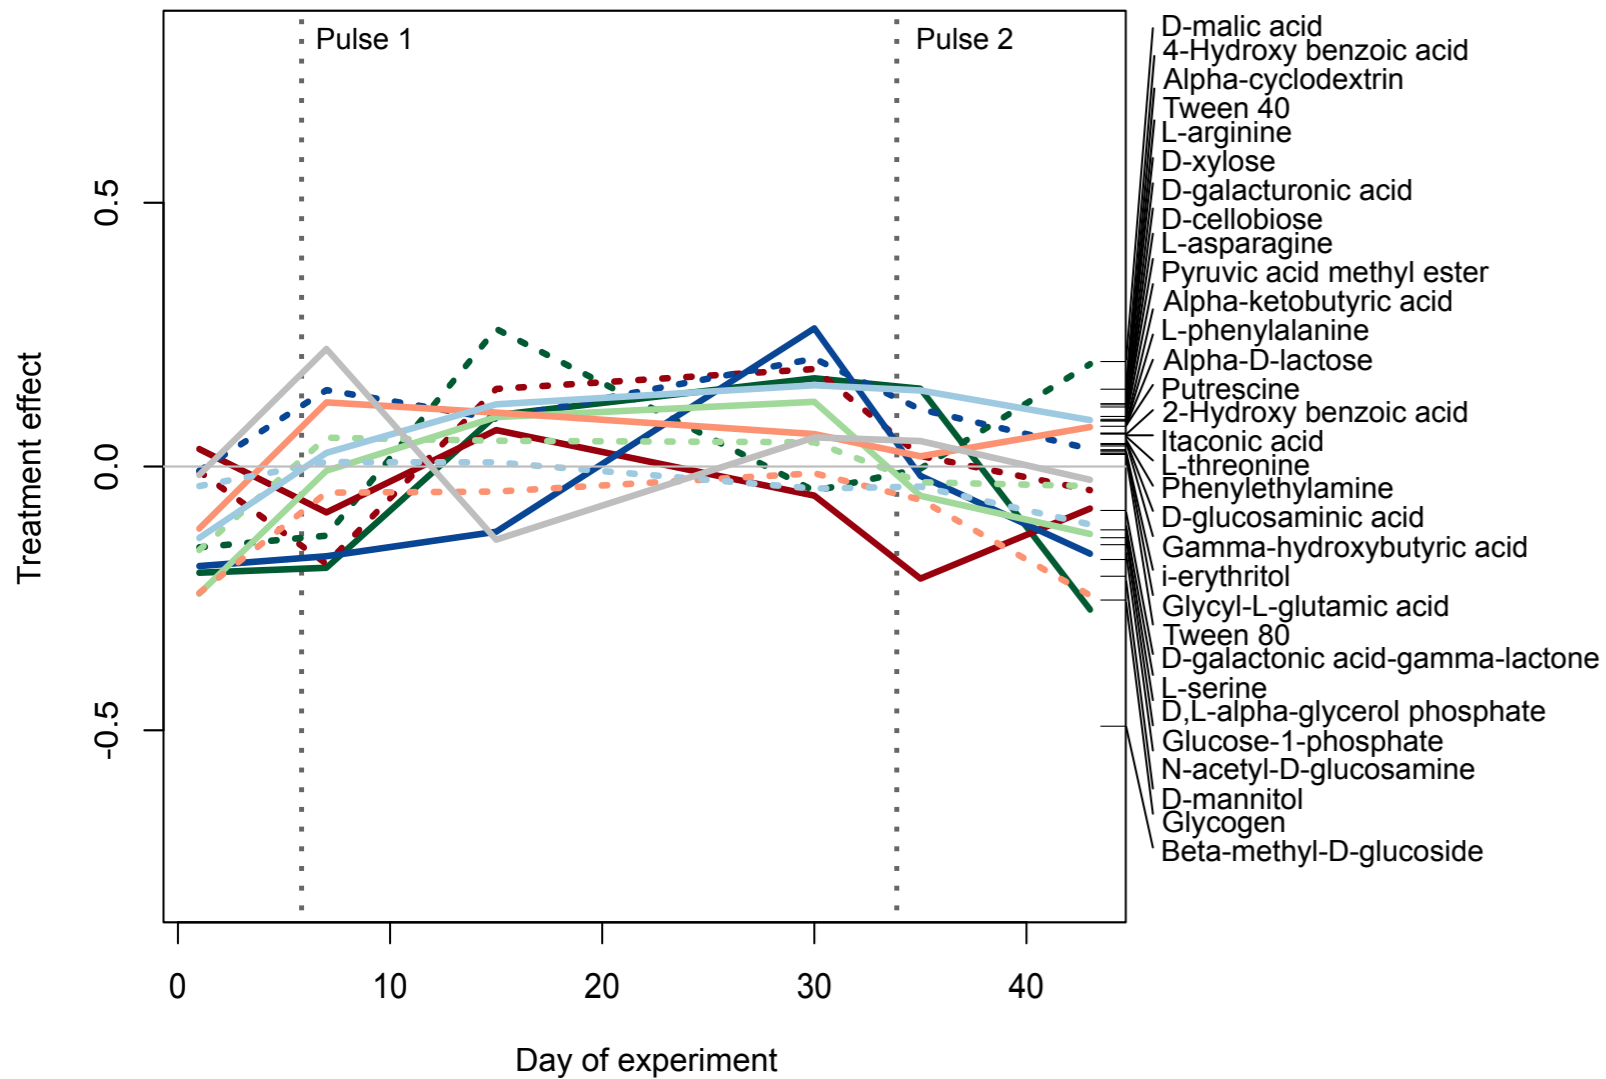

**B** Microbial community carbon substrates use by guild

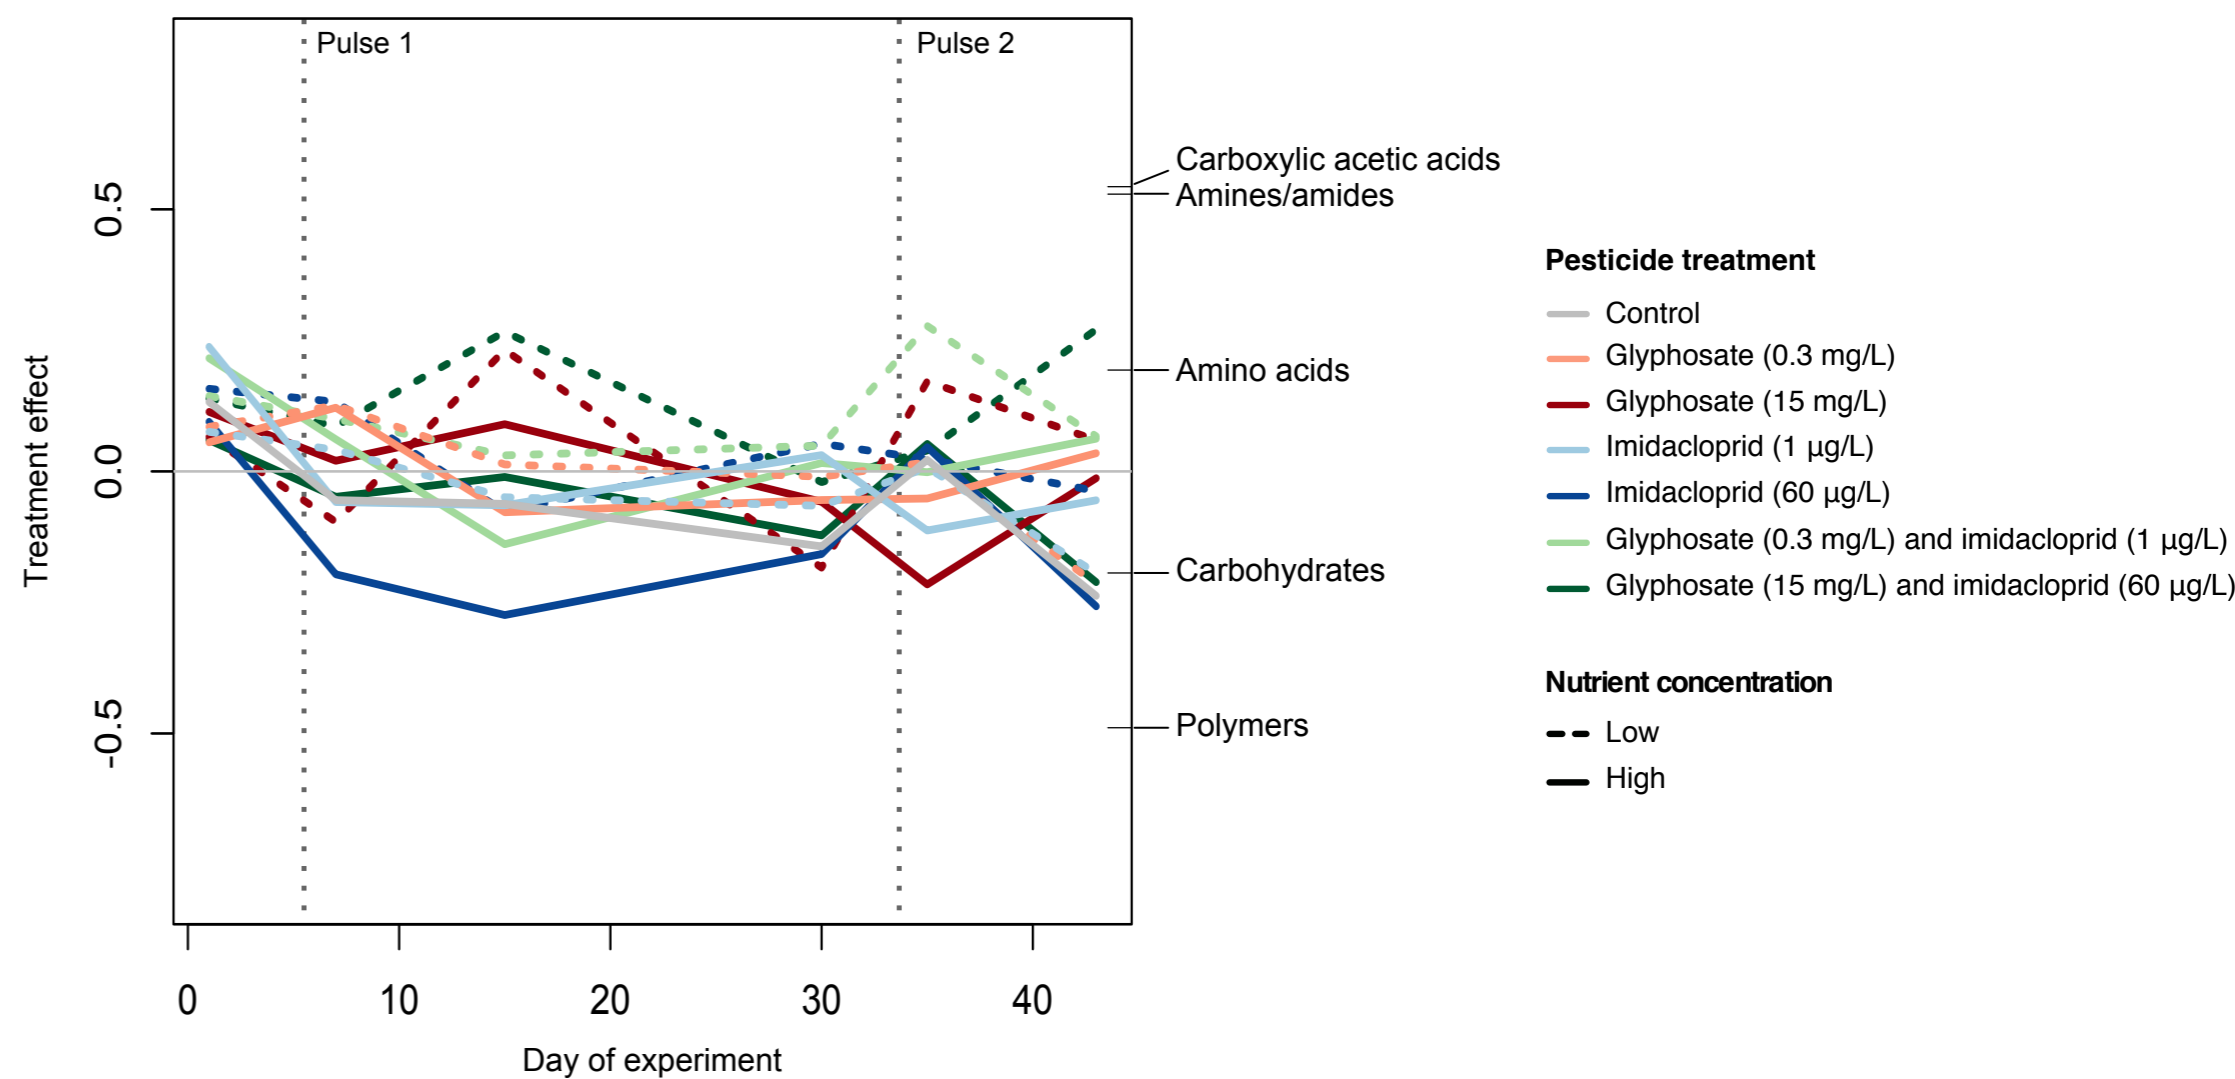

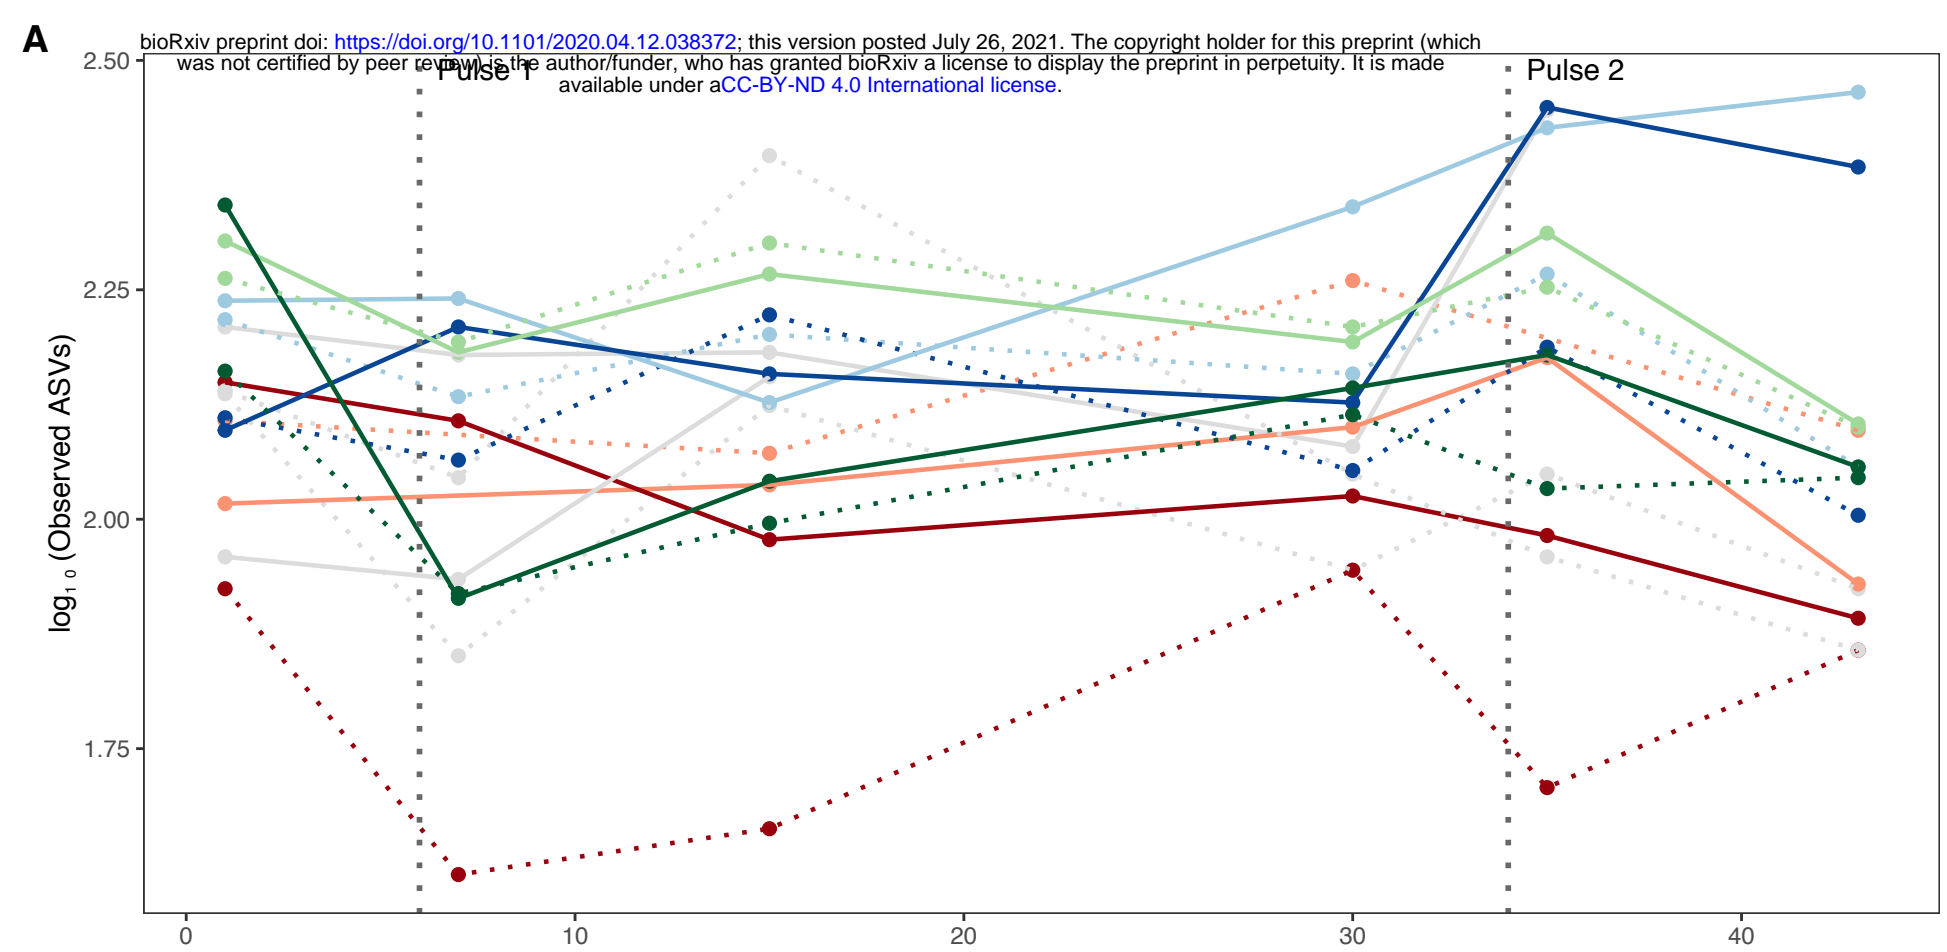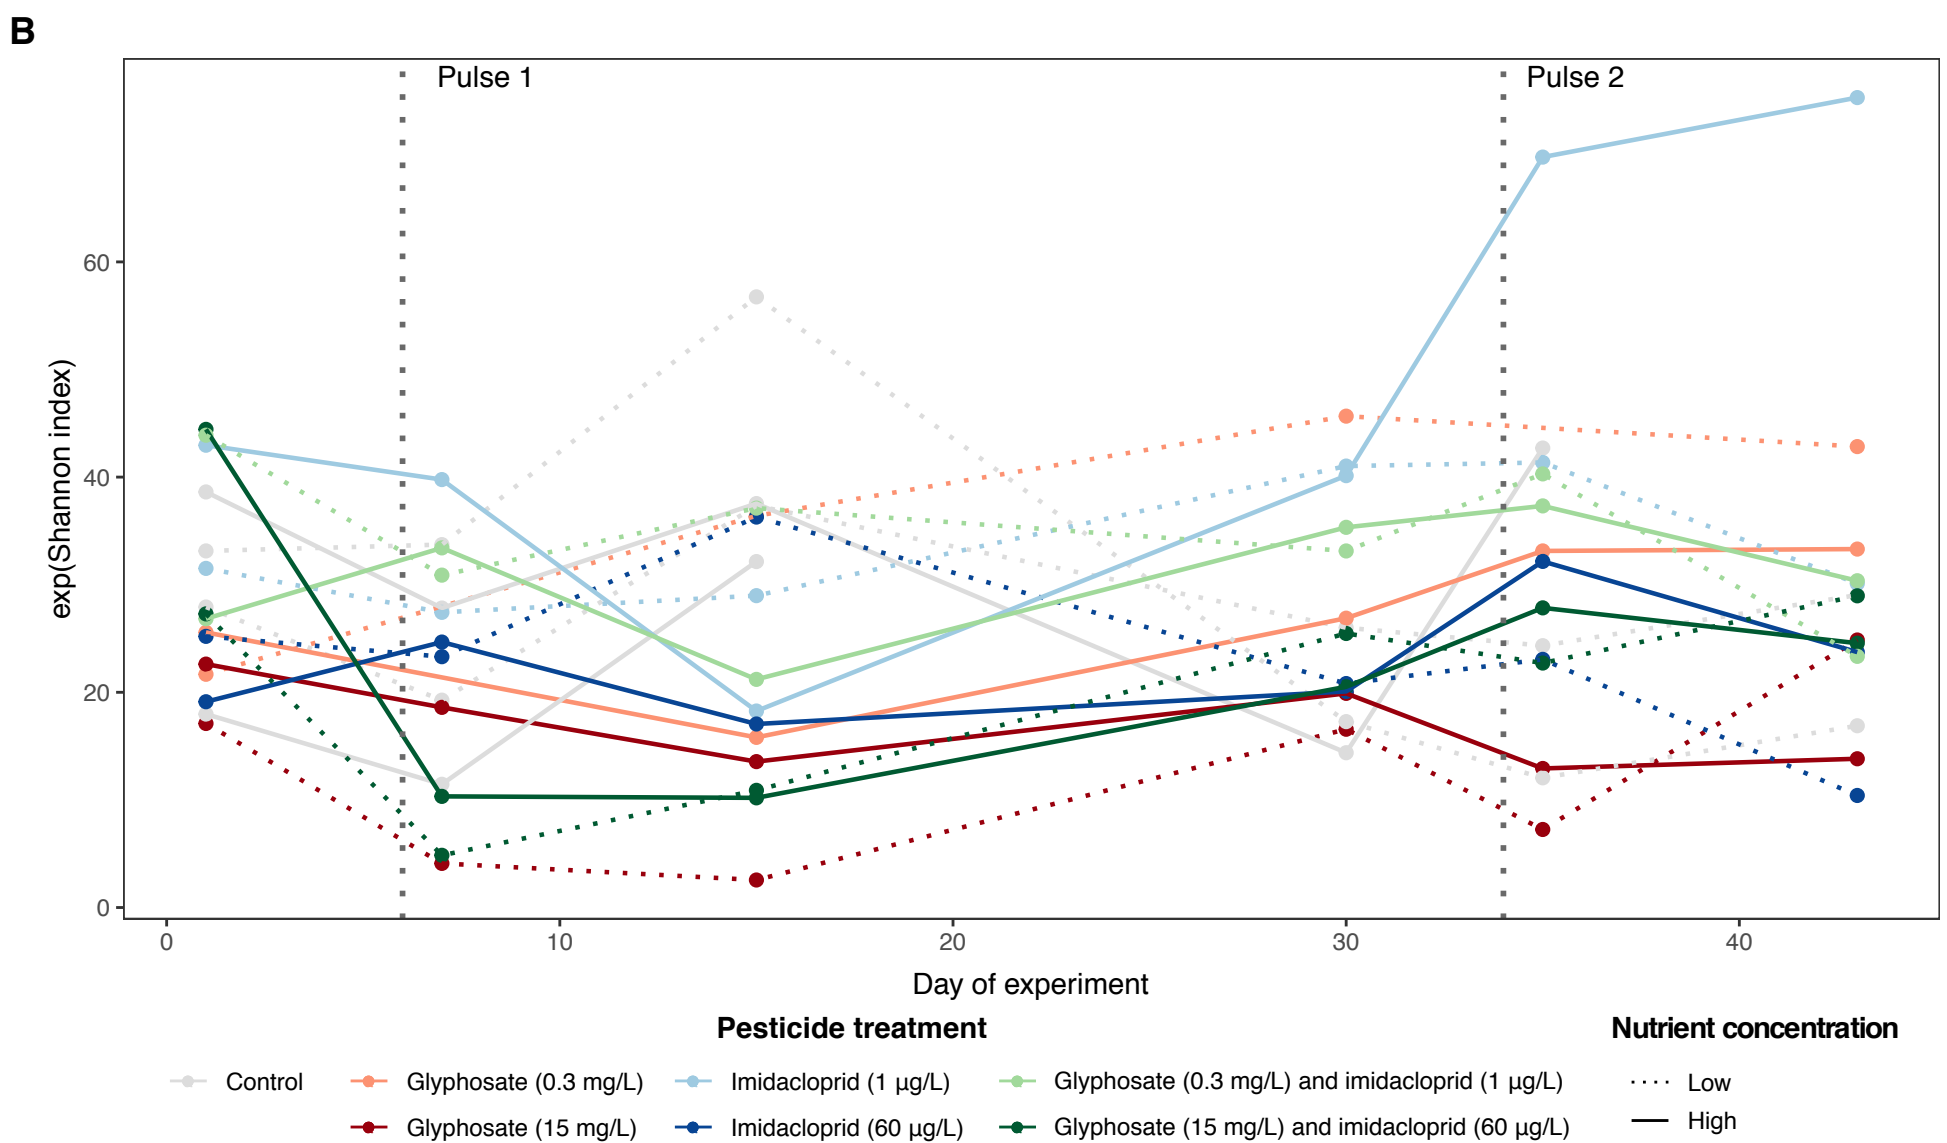

## A Weighted-UniFrac distance

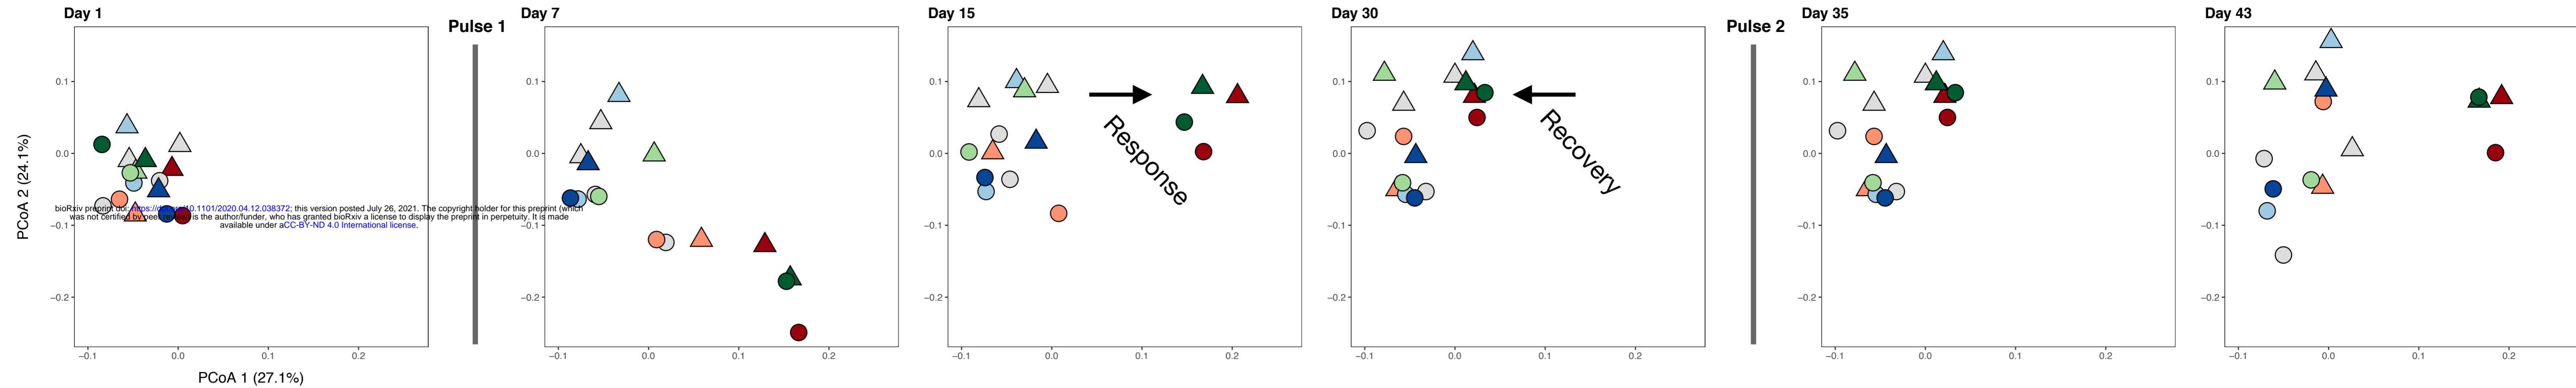

## B Jensen-Shannon divergence

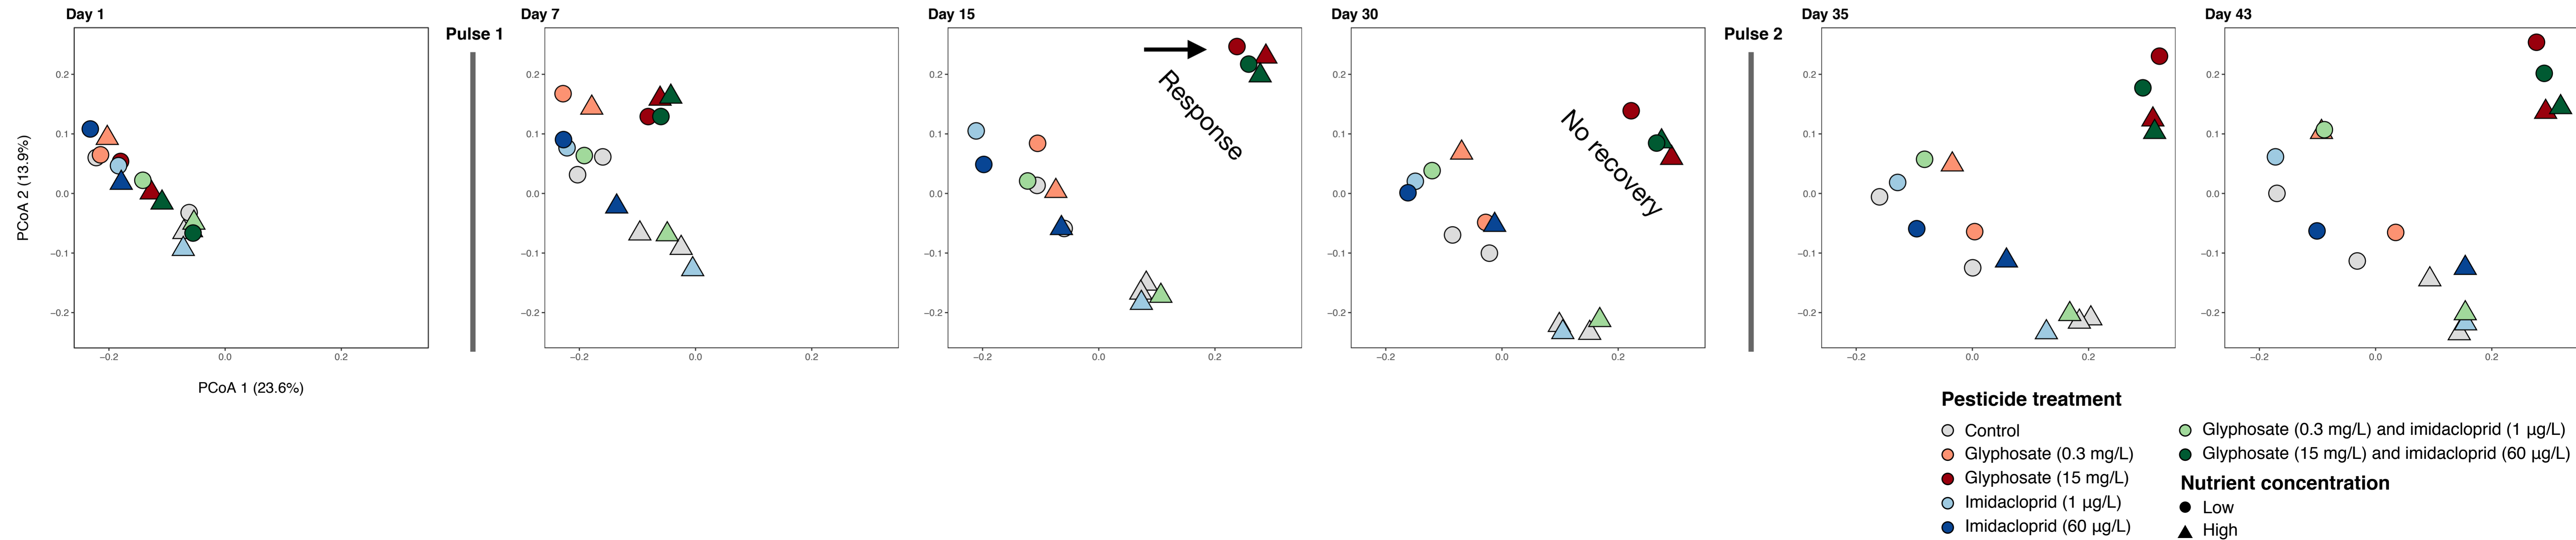

**A****Phylum**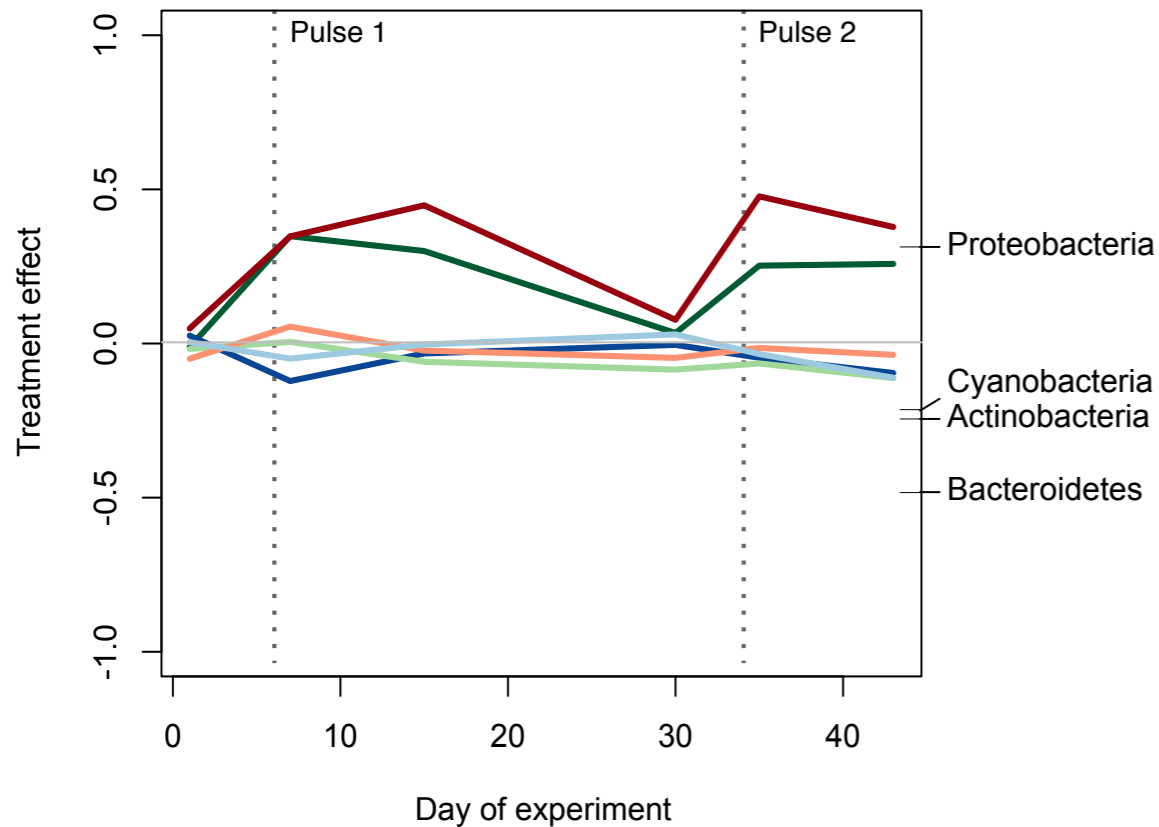**B****ASV**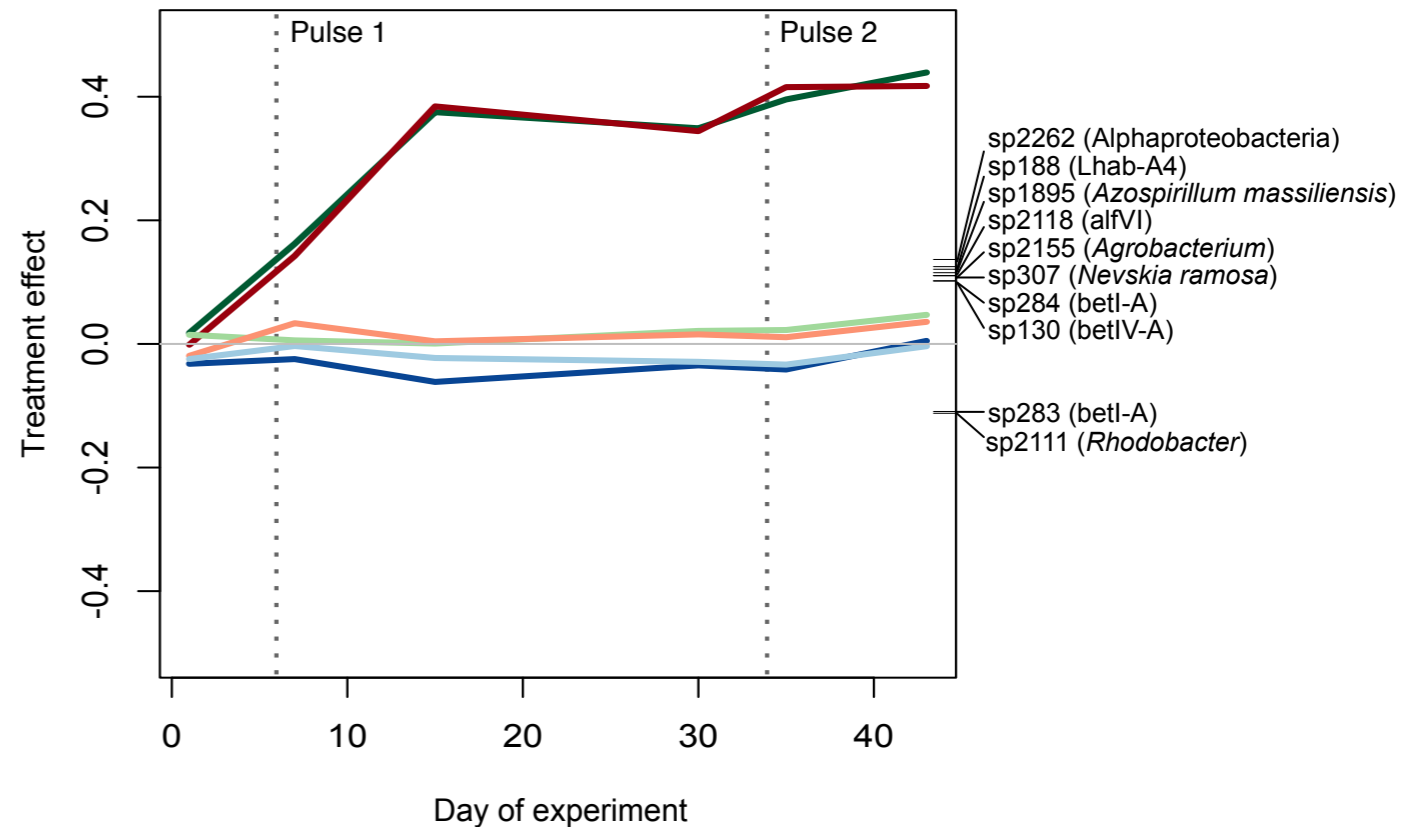**Pesticide treatment**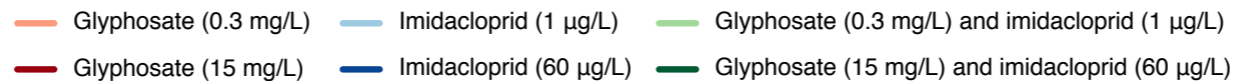

Source: https://www.biorxiv.org/content/biorxiv/early/2021/07/26/2020.04.12.038372.full.pdf
